# Supplementary material for: Synthesis of New Thiourea-Metal Complexes with Promising Anticancer Properties
Source: MDPI journal article supplement (doi:10.3390/molecules26226891), 2021-11-16

# **Synthesis of new thiourea-metal complexes with promising anticancer properties**

**Guillermo Canudo-Barreras<sup>1,2</sup>, Lourdes Ortego<sup>1</sup>, Anabel Izaga<sup>1</sup>, Isabel Marzo<sup>3</sup>, Raquel P. Herrera<sup>2,\*</sup> and M. Concepción Gimeno<sup>1,\*</sup>**

<sup>1</sup> Departamento de Química Inorgánica, Instituto de Síntesis Química y Catálisis Homogénea (ISQCH) CSIC-Universidad de Zaragoza, C/ Pedro Cerbuna 12, 50009 Zaragoza, Spain; guillermo@canudo.org (G.C.) a\_izaga\_@hotmail.com (A.I); lourdesortego@hotmail.com (L.O.).

<sup>2</sup> Laboratorio de Organocatálisis Asimétrica. Departamento de Química Orgánica, Instituto de Síntesis Química y Catálisis Homogénea (ISQCH) CSIC-Universidad de Zaragoza, C/ Pedro Cerbuna 12, 50009 Zaragoza, Spain.

<sup>3</sup> Departamento de Bioquímica y Biología Celular, Universidad de Zaragoza, C/ Pedro Cerbuna 12, 50009 Zaragoza, Spain. imarzo@unizar.es (I.M.)

Correspondence: gimeno@unizar.es, +34 976762291 (M.C.G.); raquelph@unizar.es; Tel.: +34 976761190 (R.P.H.).

**Figure S1.**  $^1\text{H}$ ,  $^{13}\text{C}$ -APT,  $^{31}\text{P}\{^1\text{H}\}$  and  $^{19}\text{F}$  NMR spectra ( $\text{CD}_2\text{Cl}_2$ ) of **T1**.

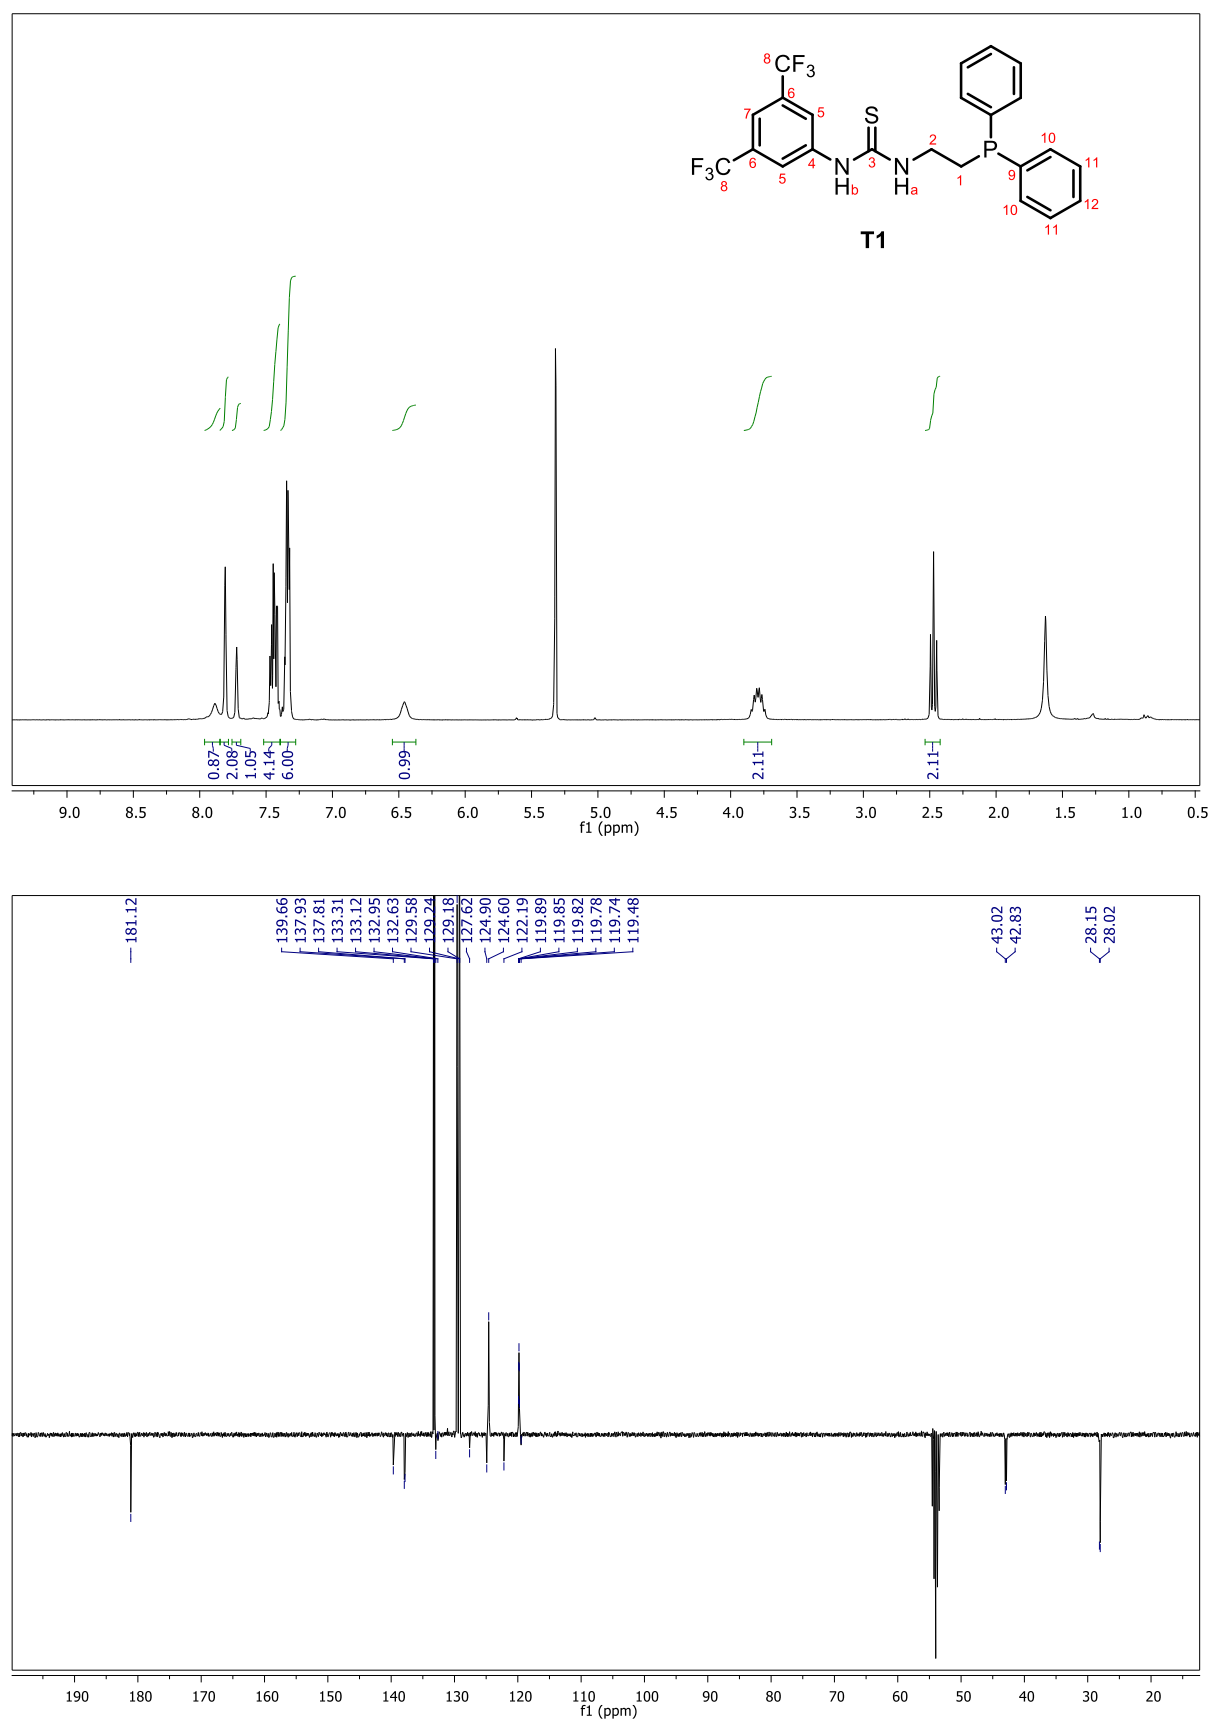

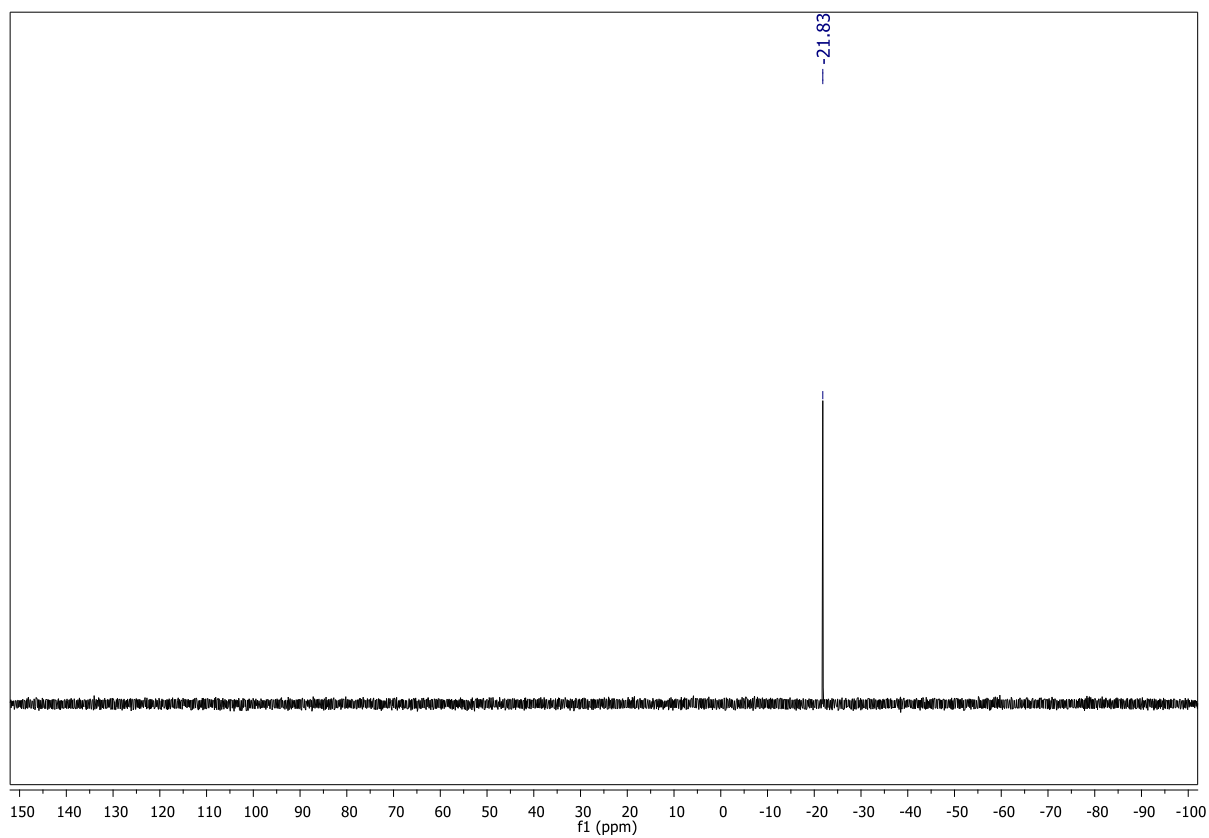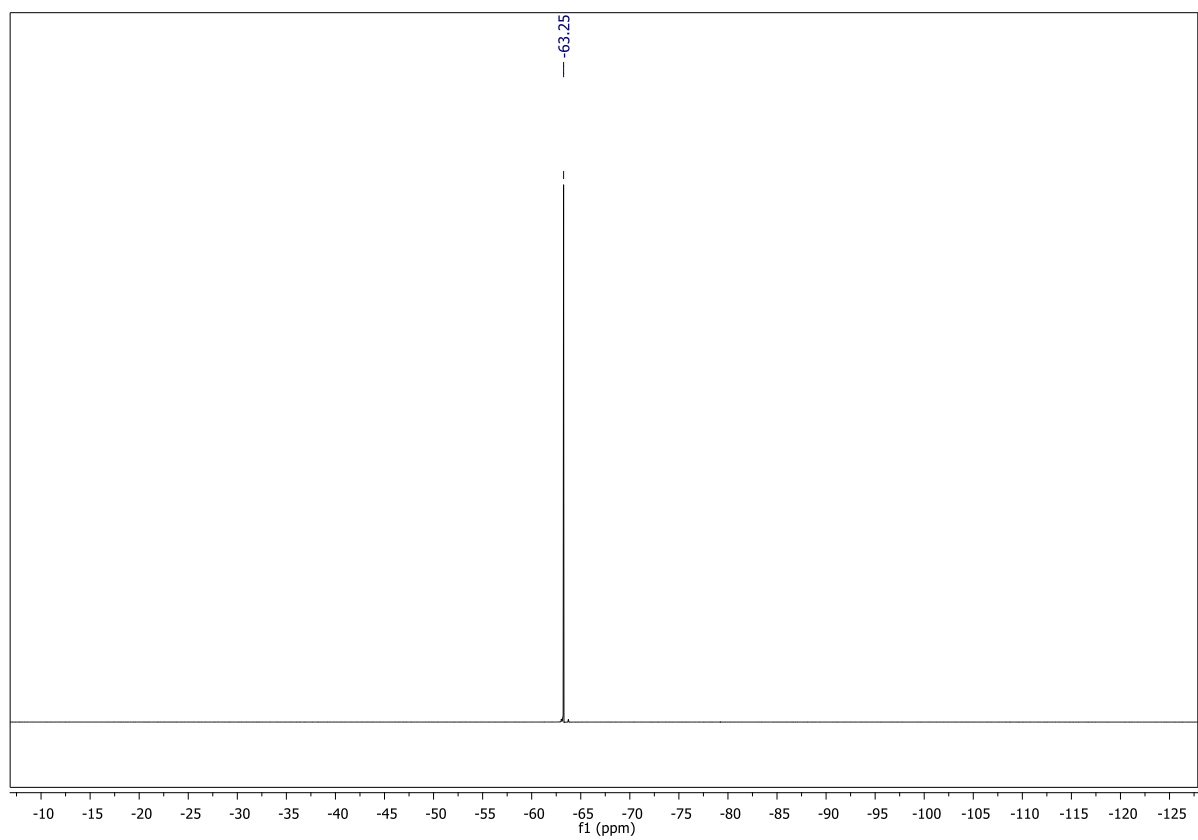

**Figure S2.**  $^1\text{H}$ ,  $^{13}\text{C}$ -APT,  $^{31}\text{P}\{^1\text{H}\}$  and  $^{19}\text{F}$  NMR spectra ( $\text{CD}_2\text{Cl}_2$ ) for complex **C1a**.

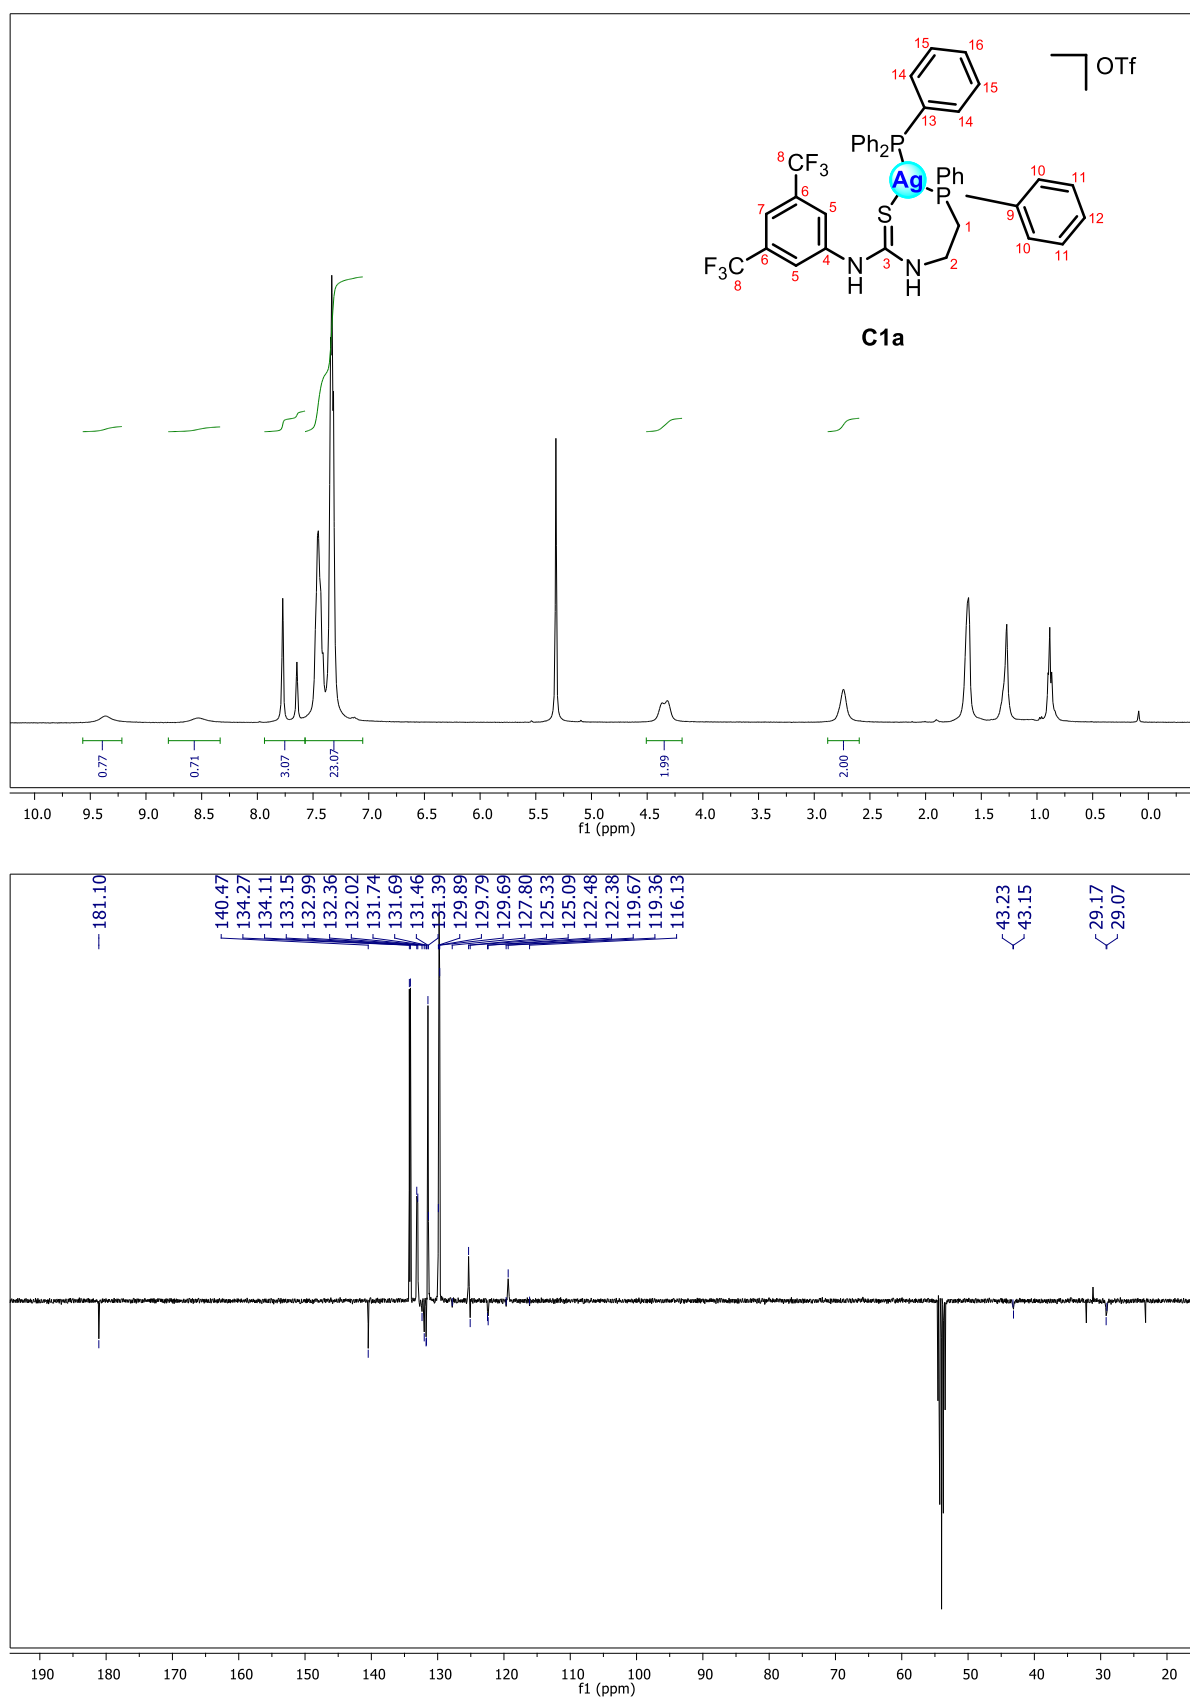

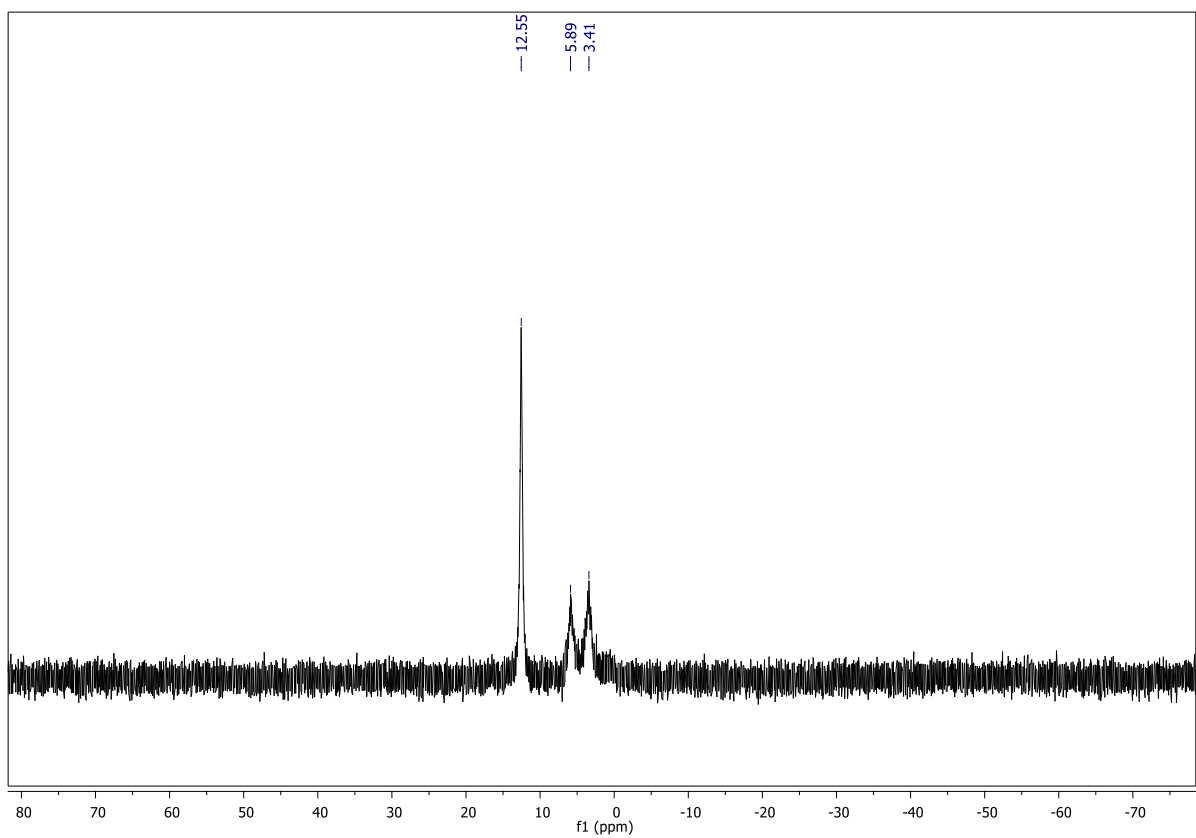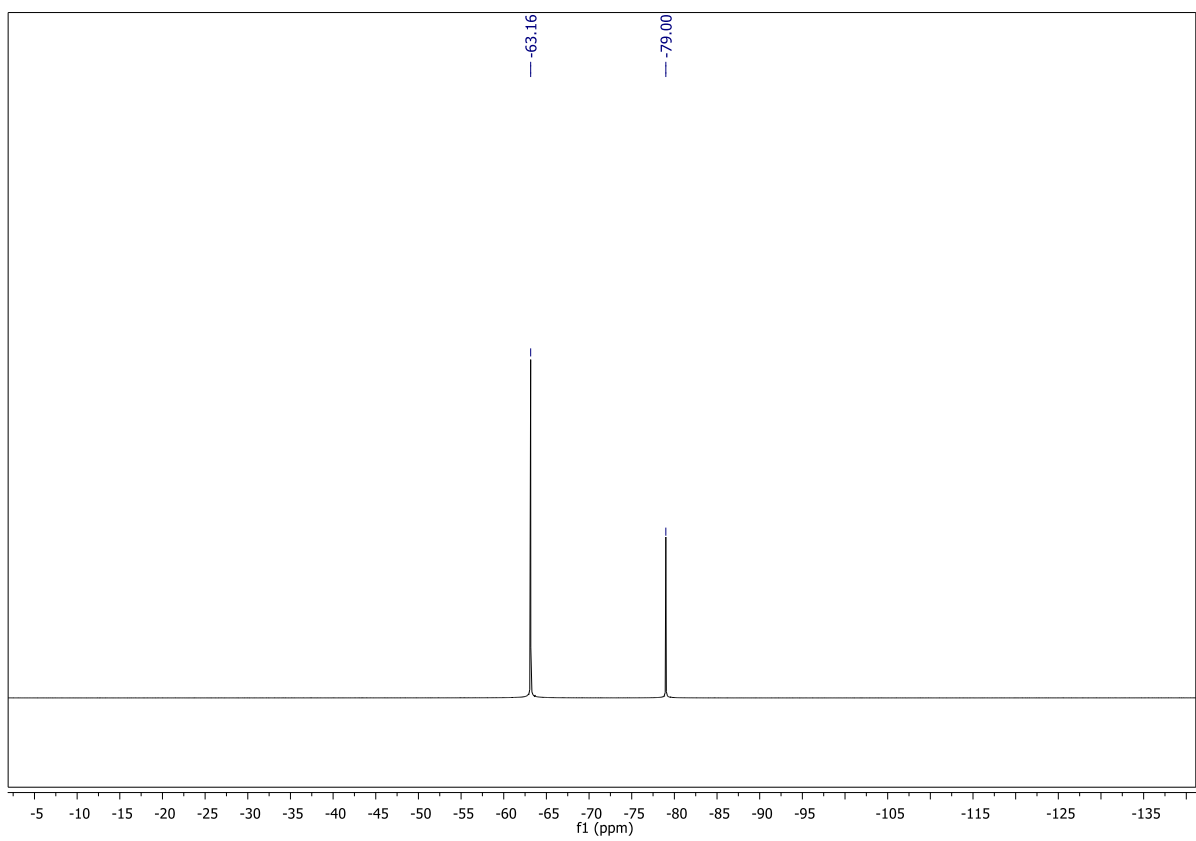

**Figure S3.**  $^1\text{H}$  NMR spectrum ( $\text{DMSO}-d_6$ ) for complex **C1a**.

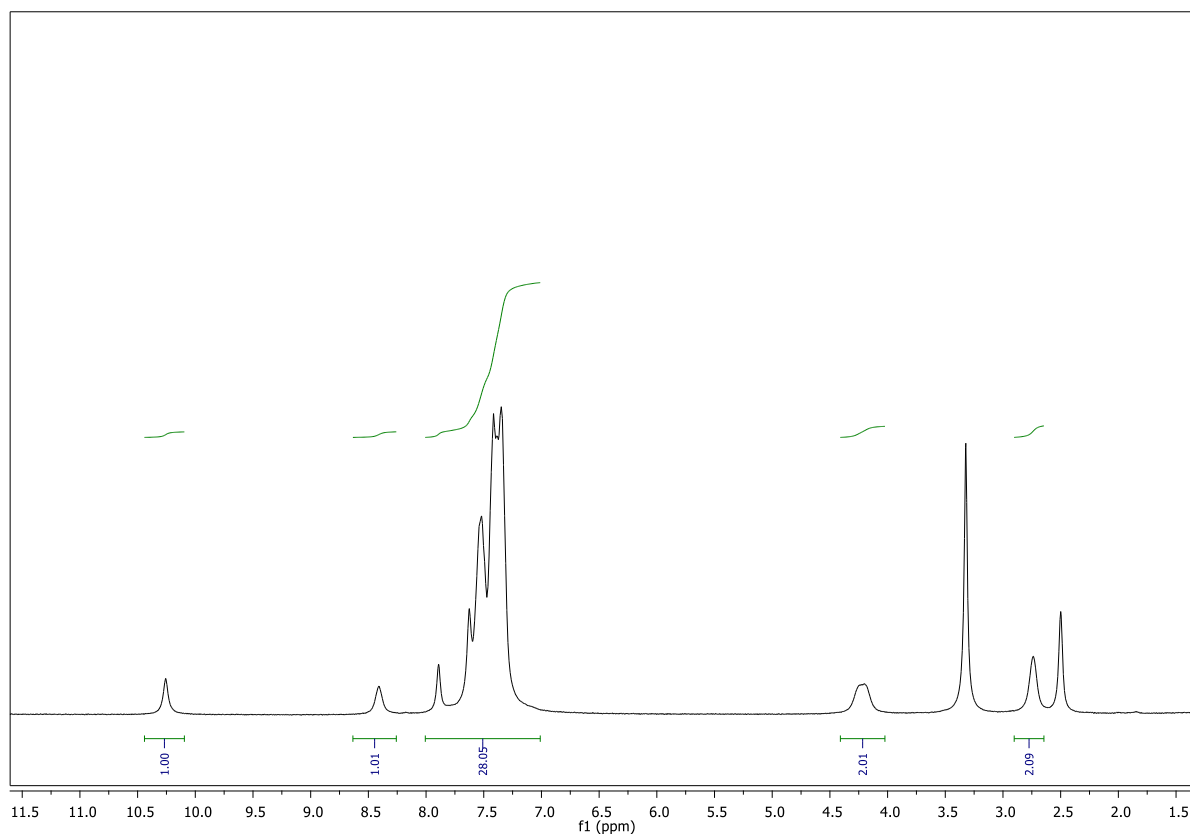

**Figure S4.** Spectra of  $^1\text{H}$ ,  $^{13}\text{C}$ -APT,  $^{31}\text{P}\{^1\text{H}\}$  and  $^{19}\text{F}$  NMR spectra ( $\text{CD}_2\text{Cl}_2$ ) for complex **C1b**.

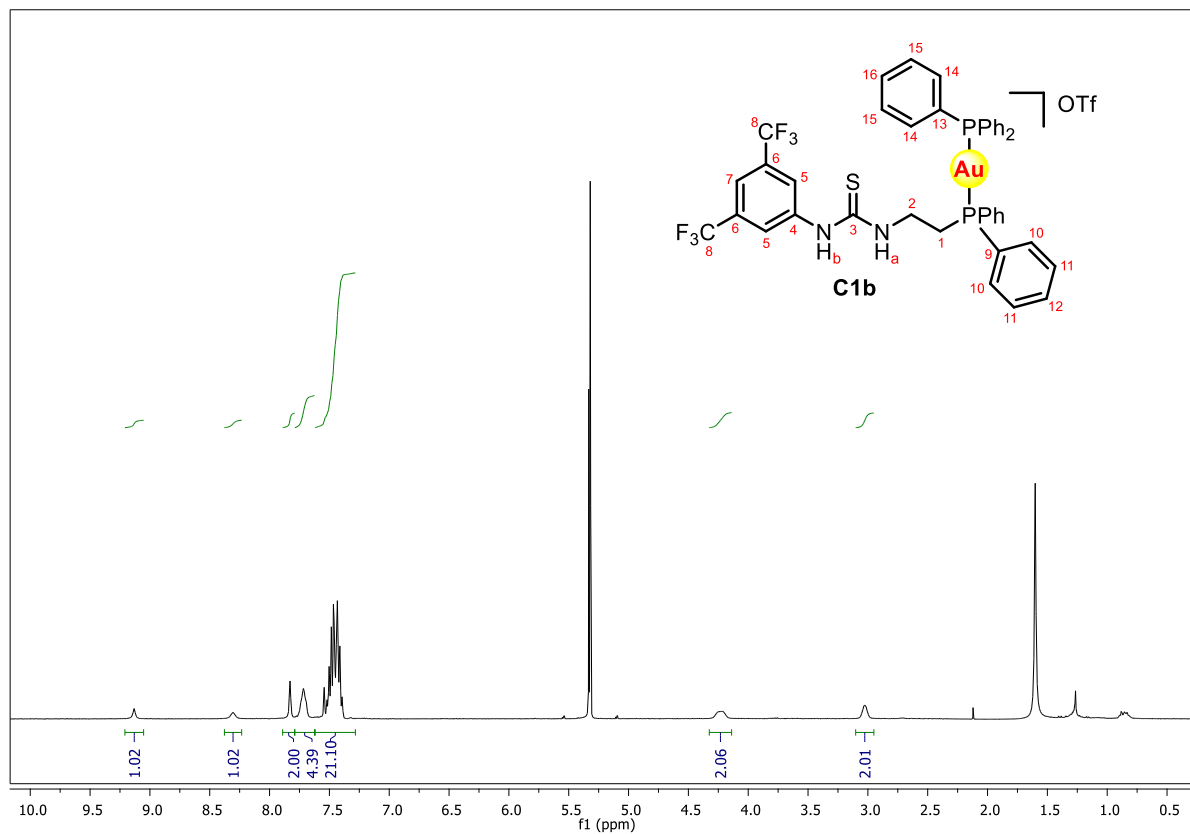

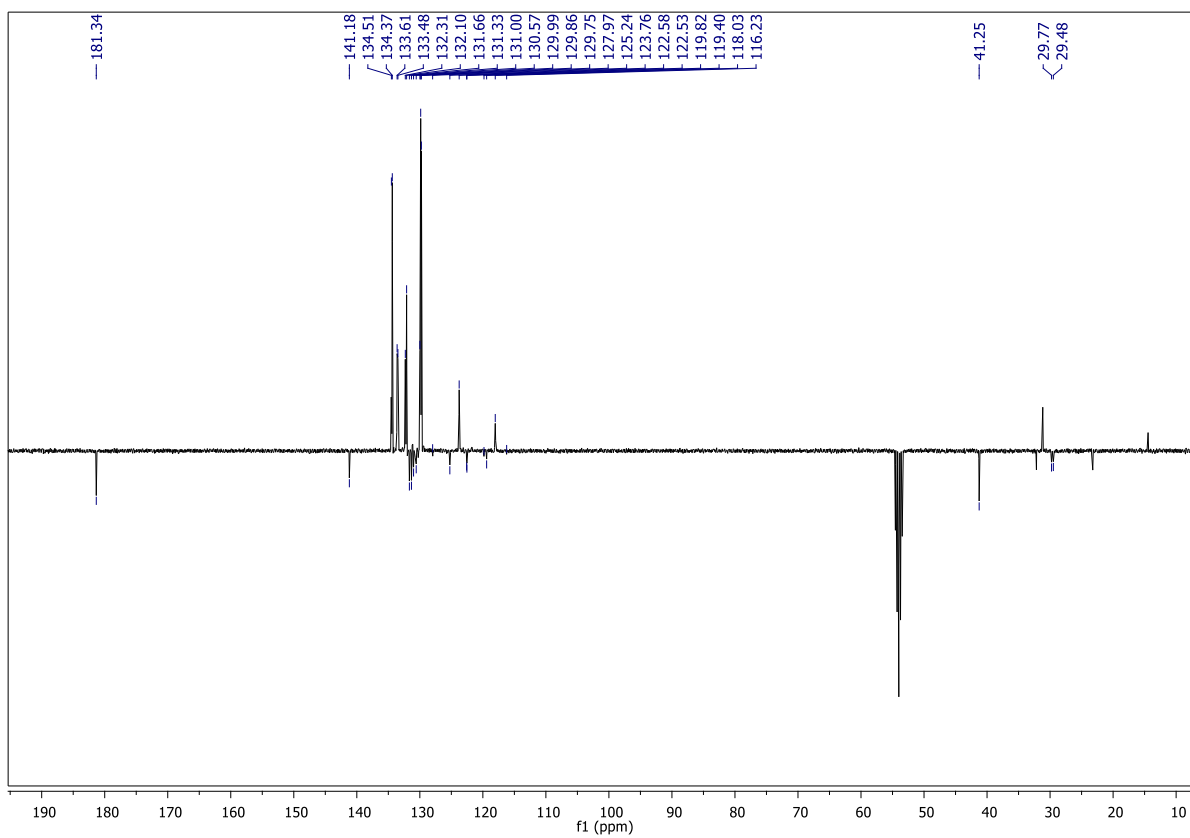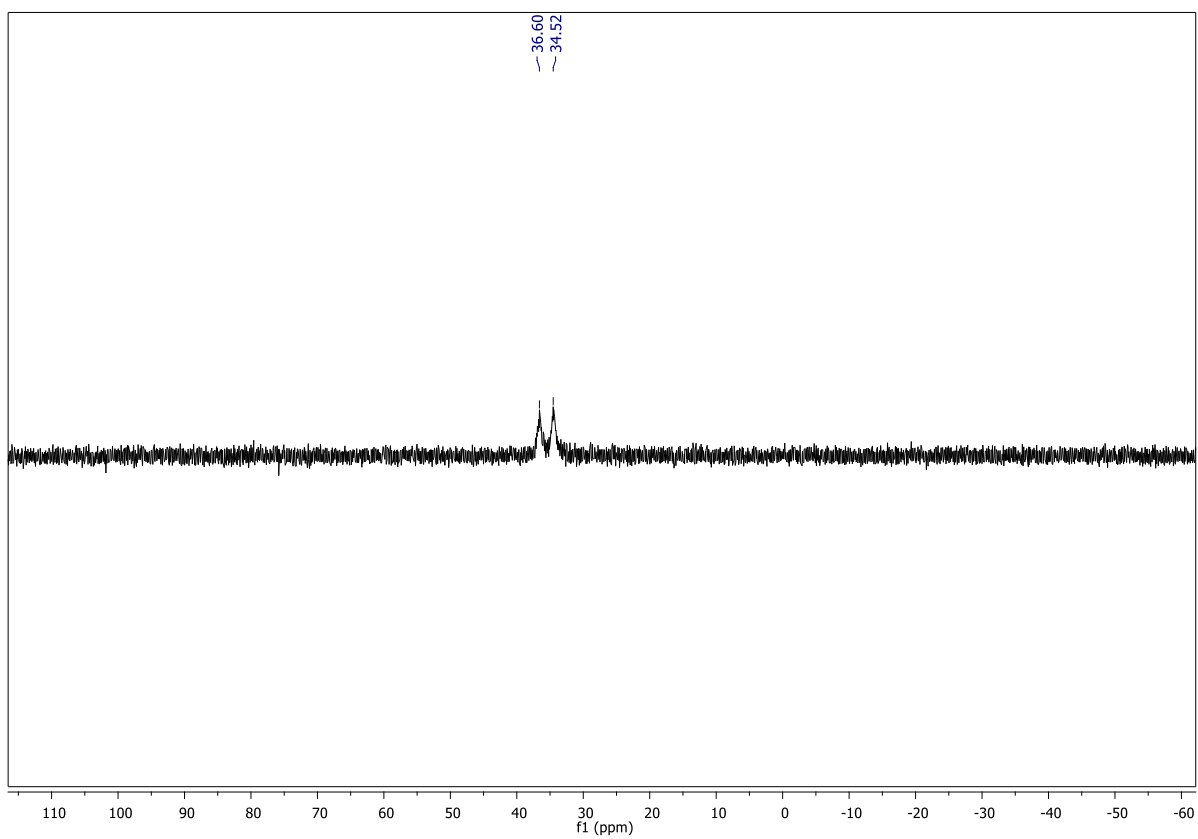

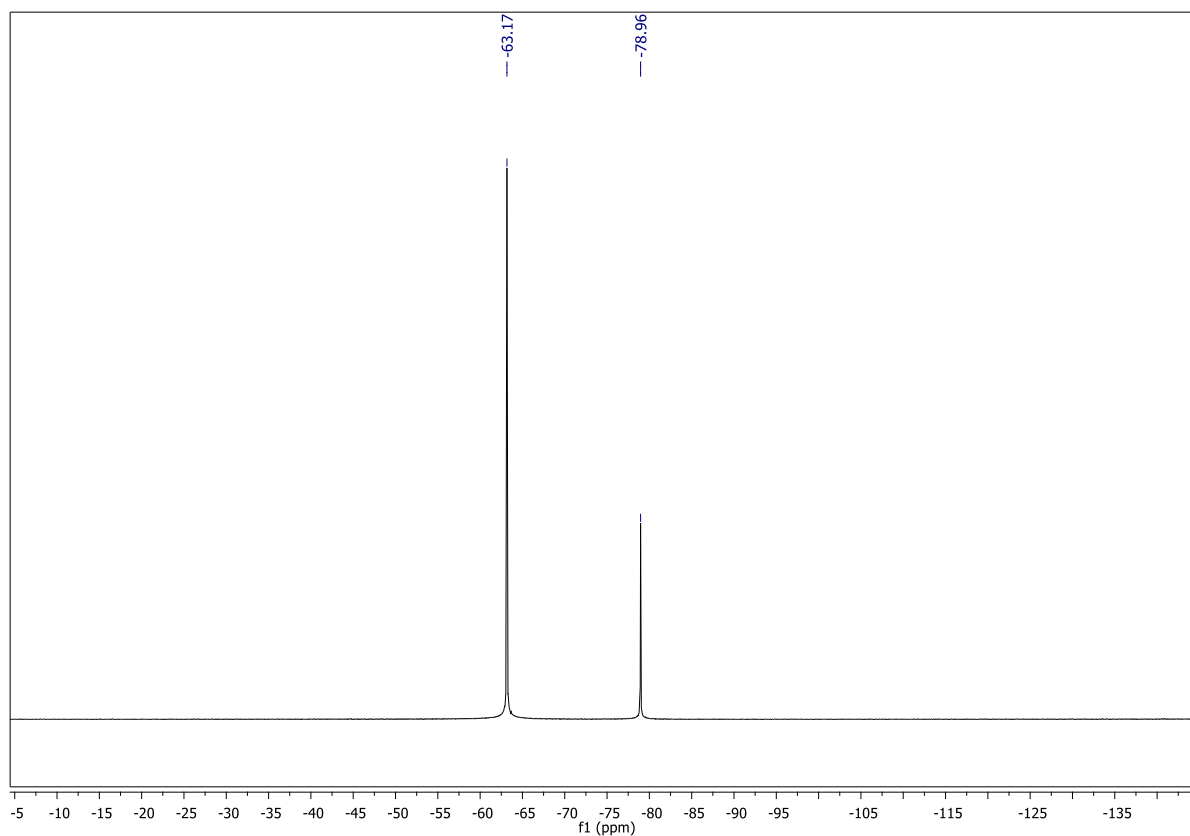

**Figure S5.** Spectra of  $^1\text{H}$ ,  $^{13}\text{C}$ -APT,  $^{31}\text{P}\{^1\text{H}\}$  and  $^{19}\text{F}$  NMR spectra ( $\text{CD}_2\text{Cl}_2$ ) for complex **C1c**.

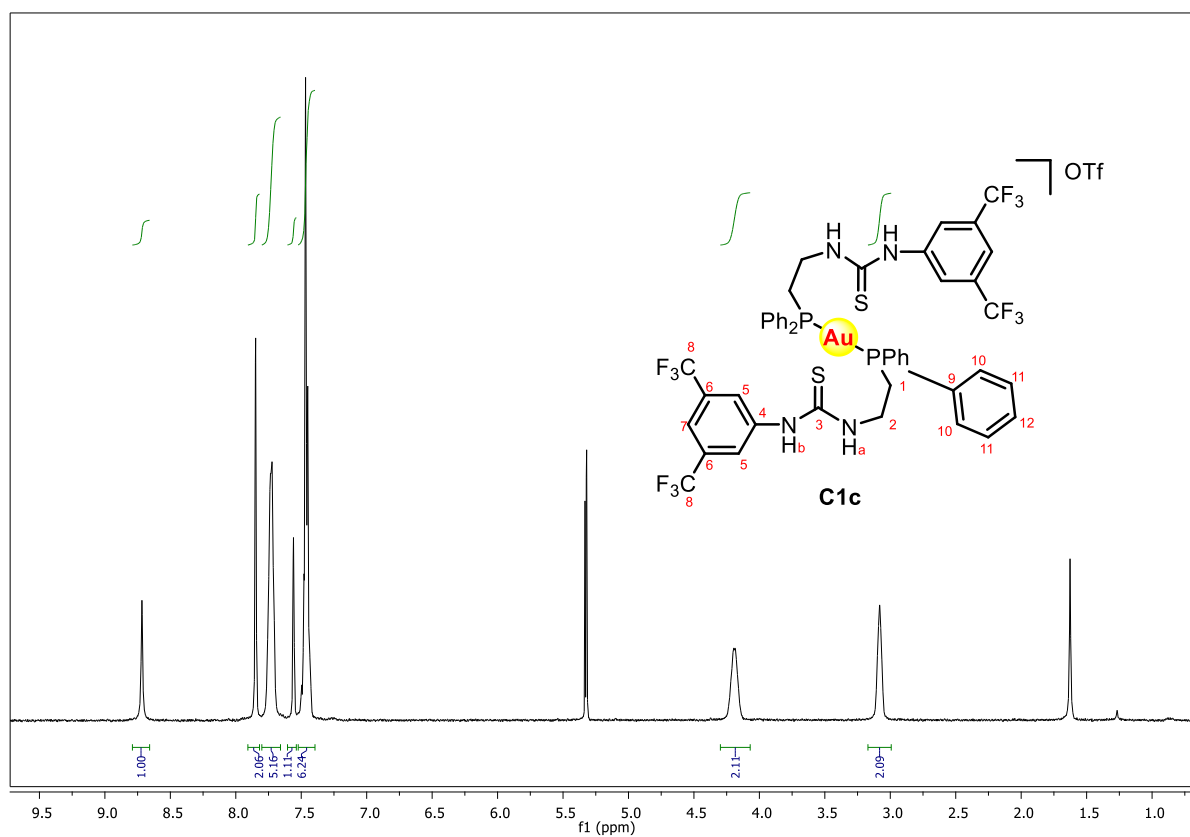



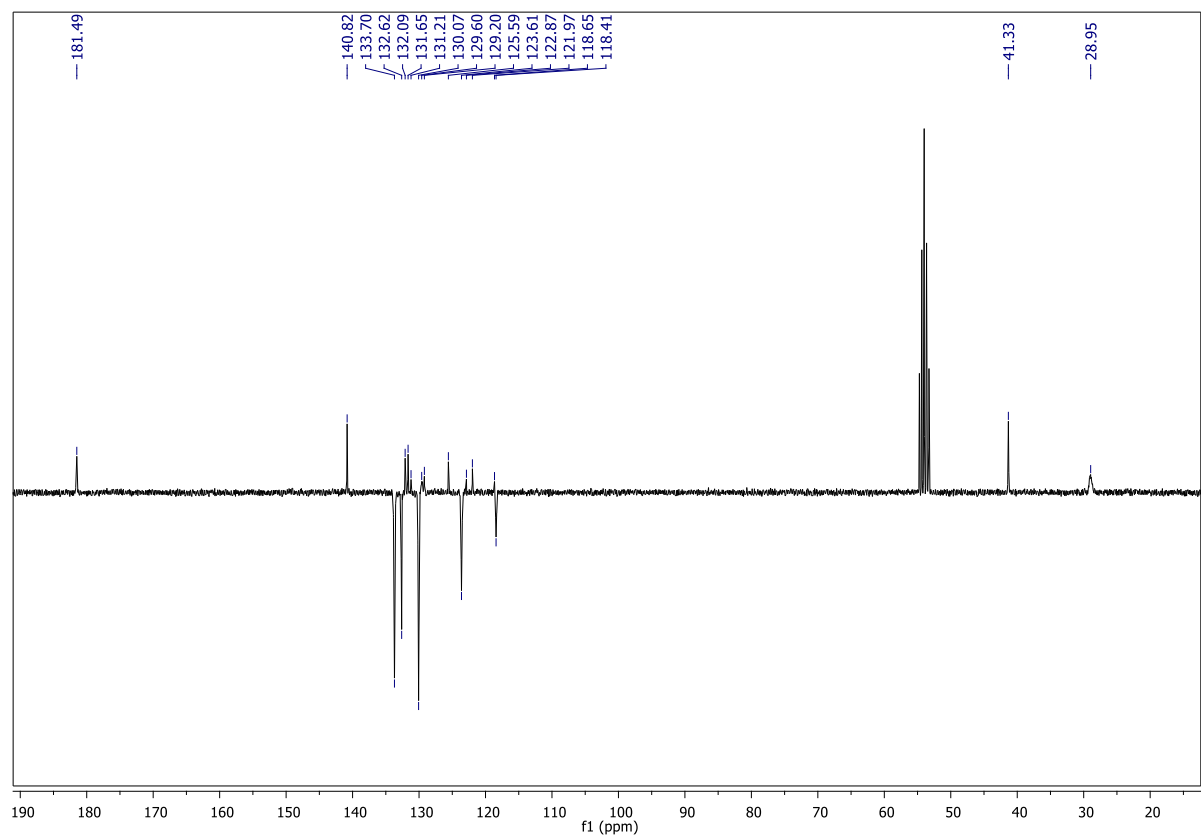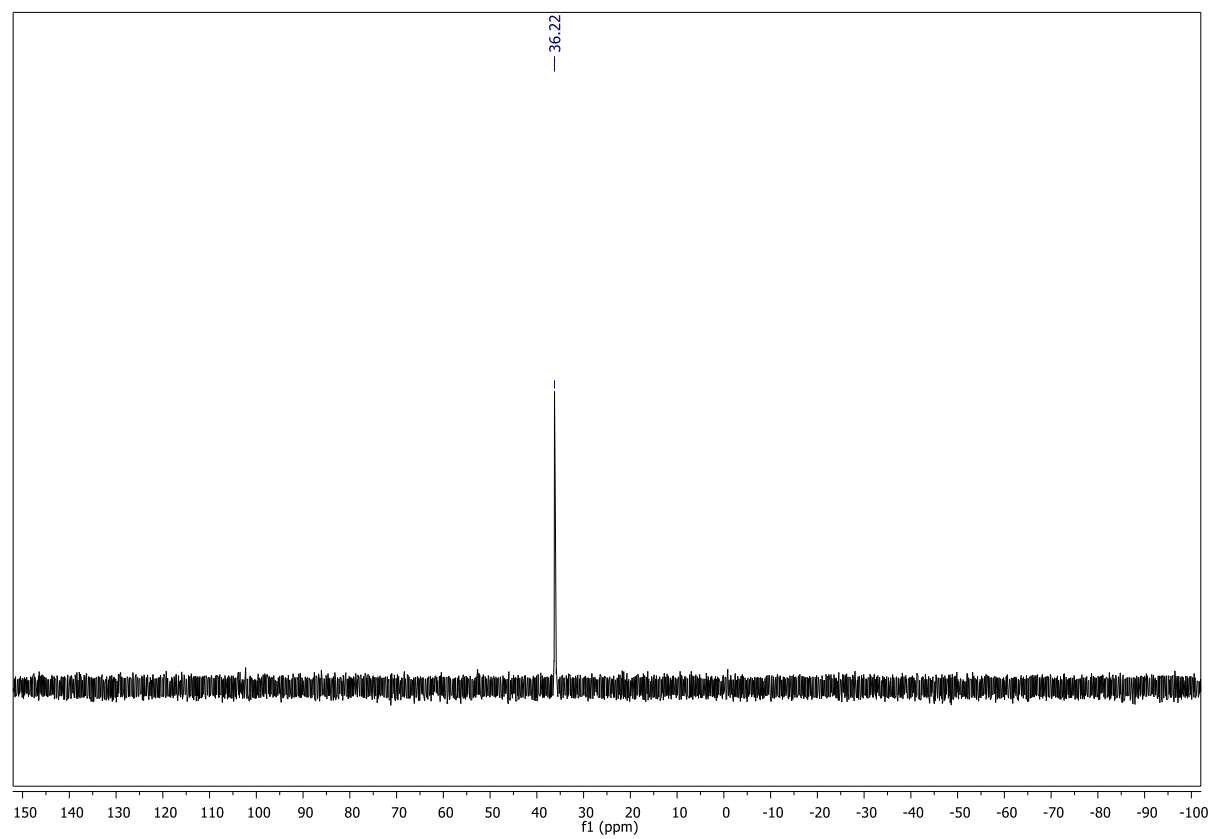

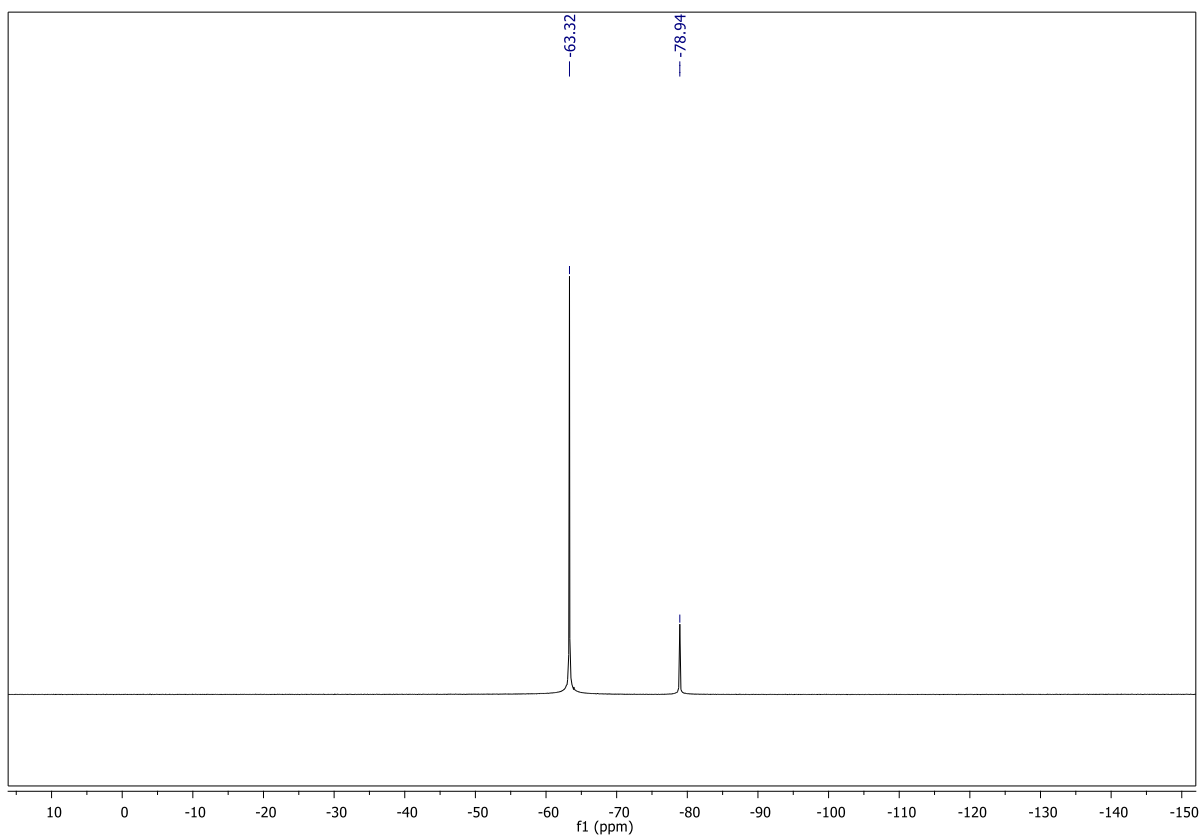

**Figure S6.**  $^1\text{H}$ ,  $^{13}\text{C}$ -APT,  $^{31}\text{P}\{^1\text{H}\}$  and  $^{19}\text{F}$  NMR spectra ( $\text{CD}_2\text{Cl}_2$ ) for complex **C1d**.

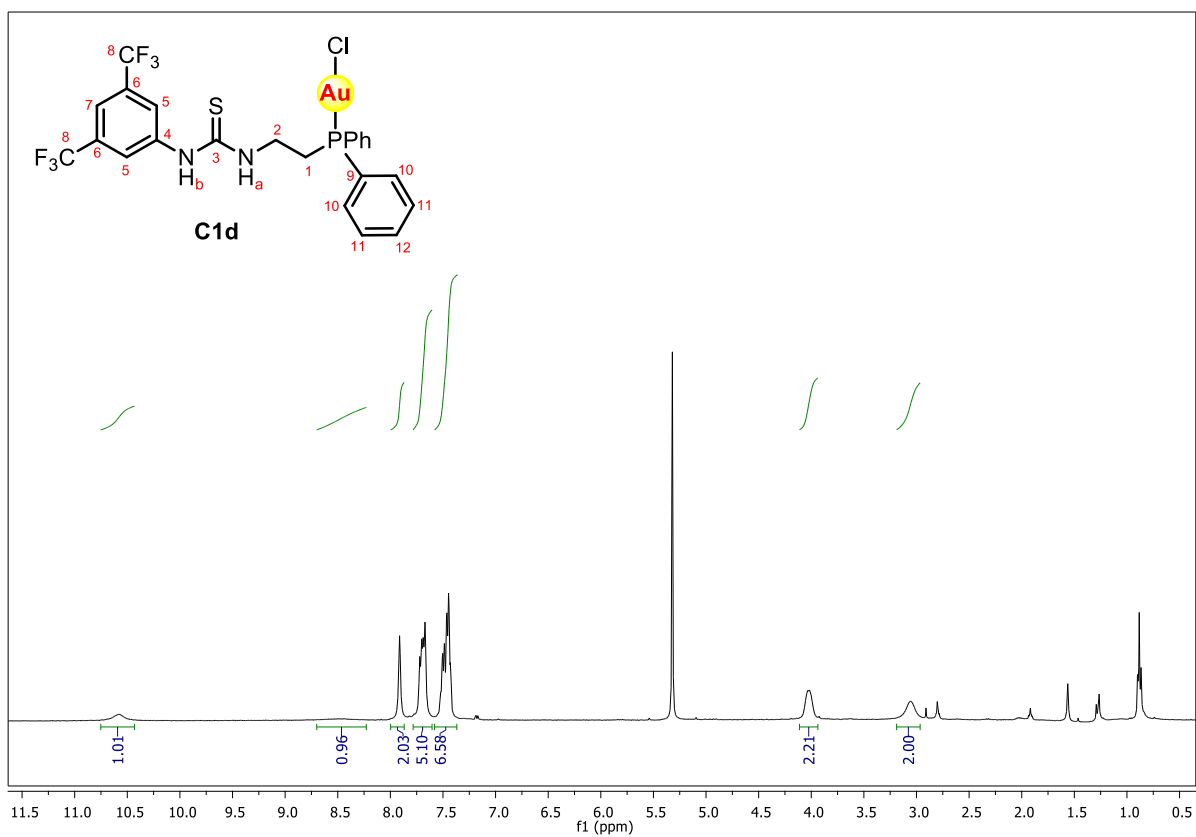

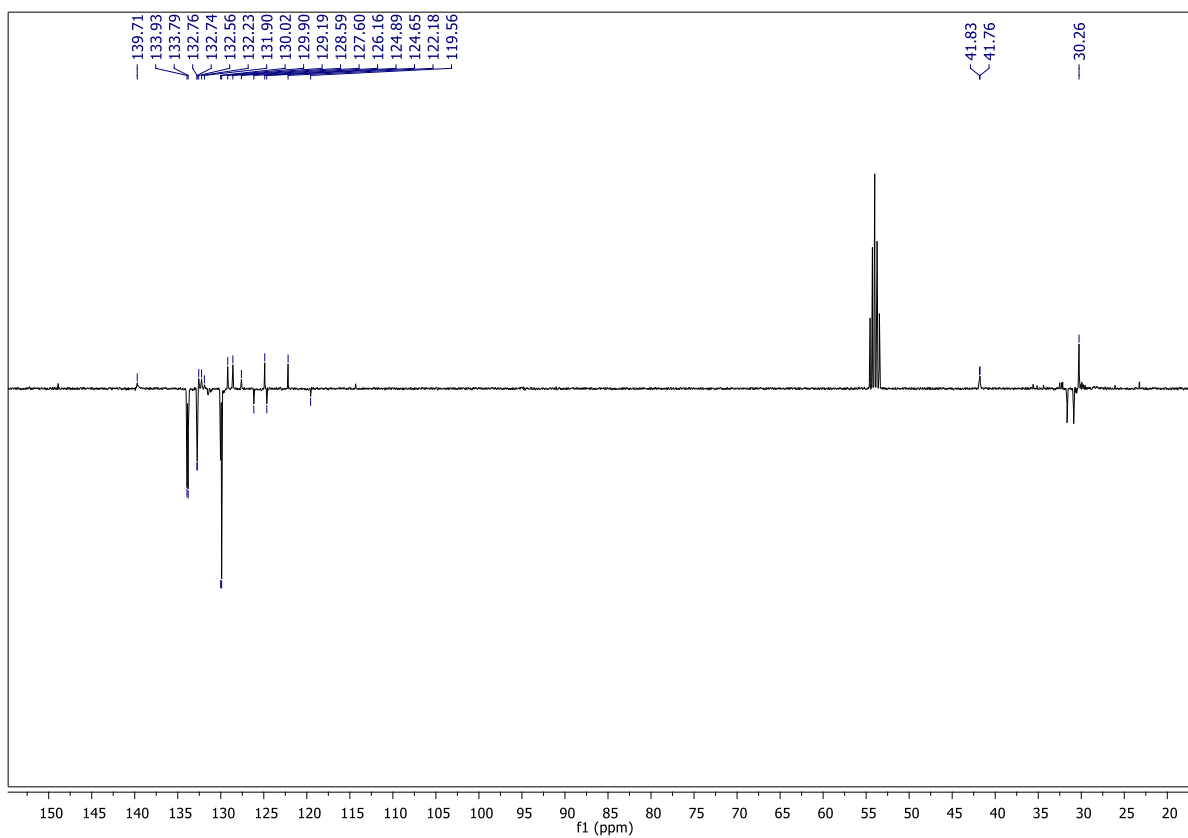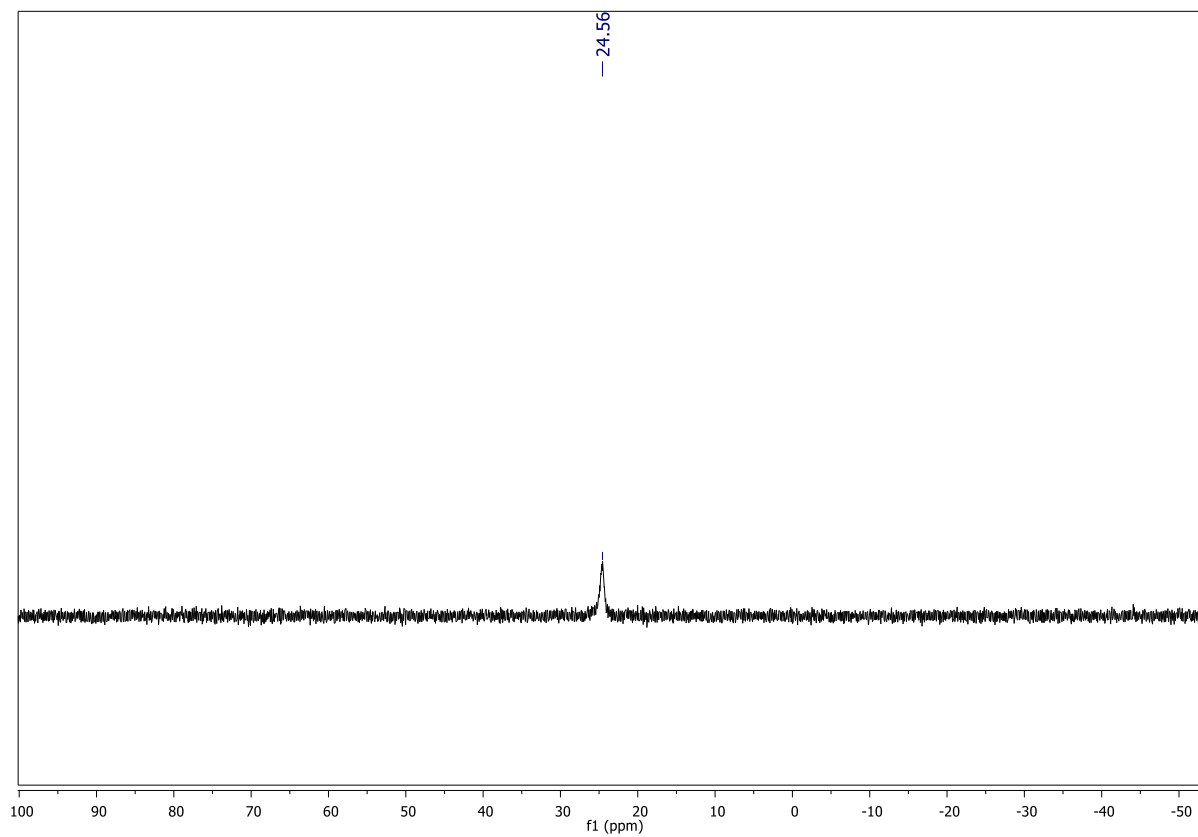

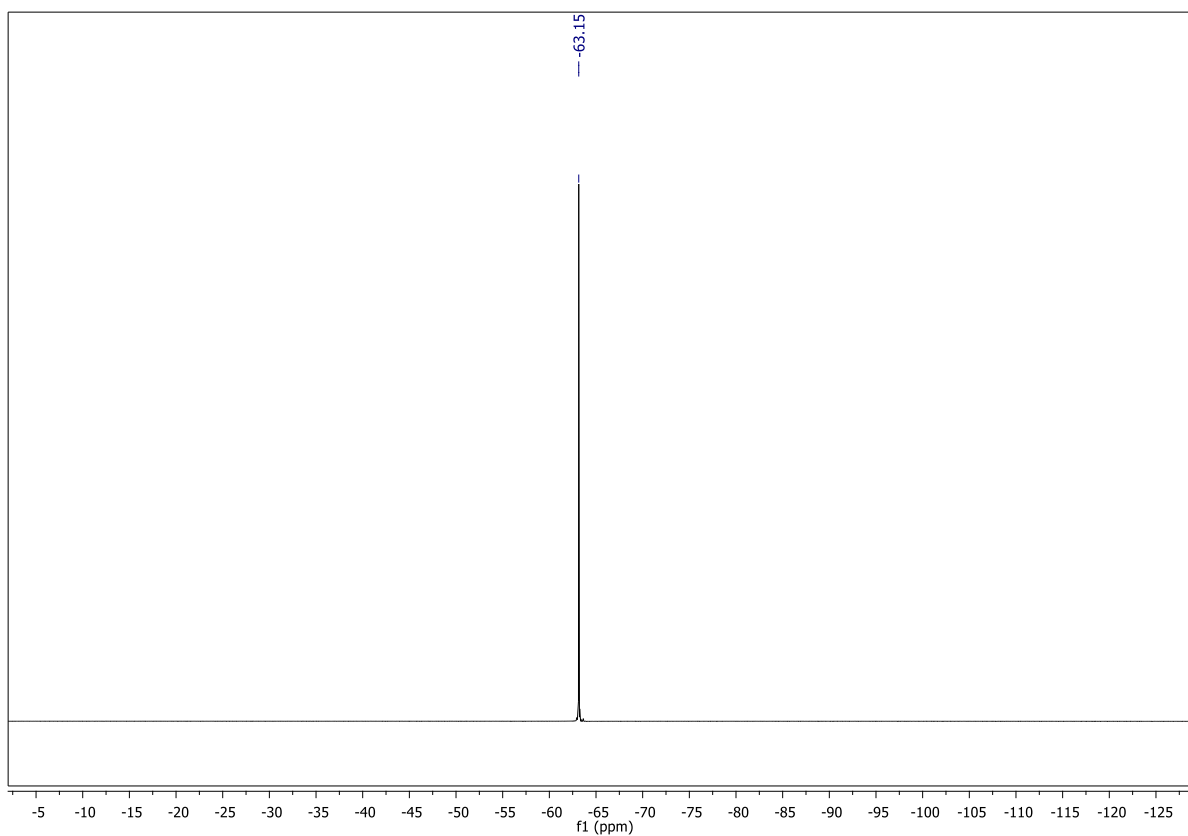

**Figure S7.**  $^1\text{H}$ ,  $^{13}\text{C}$ -APT,  $^{31}\text{P}\{^1\text{H}\}$  and  $^{19}\text{F}$  NMR spectra ( $\text{CD}_2\text{Cl}_2$ ) of complex **C1e**.

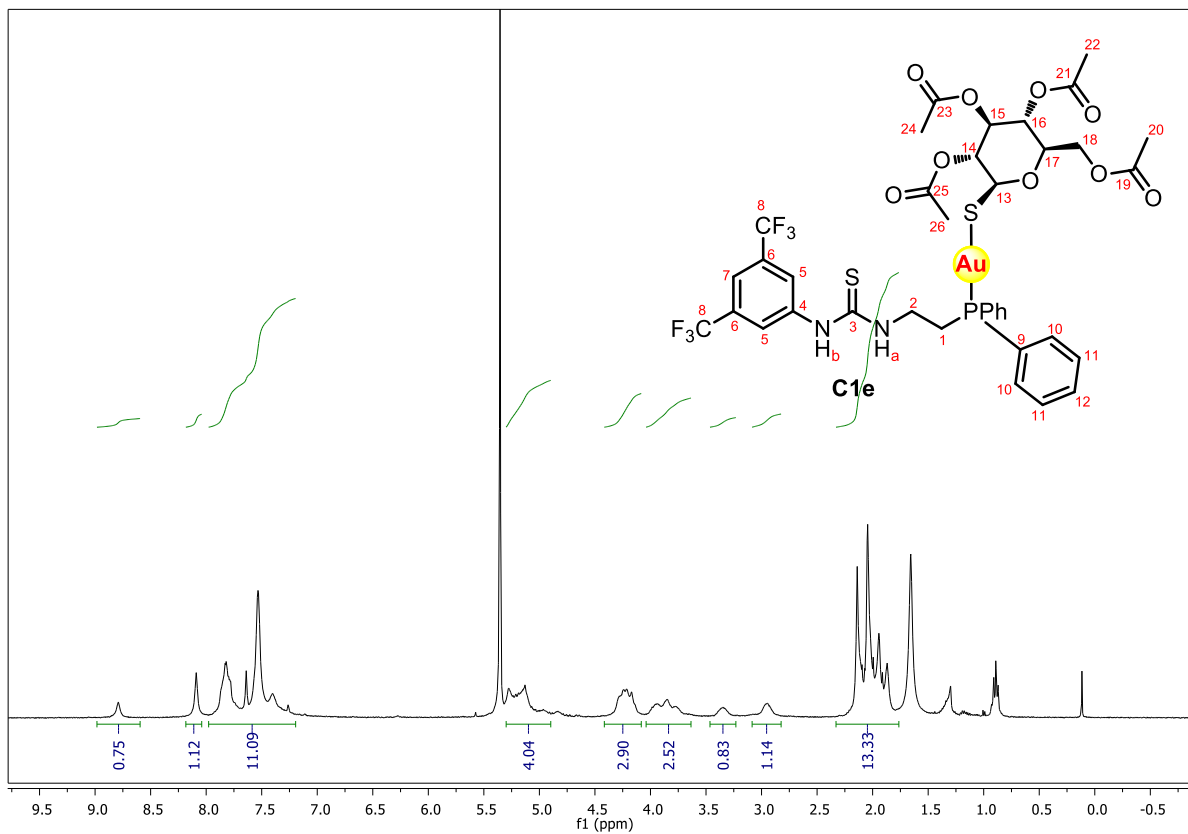

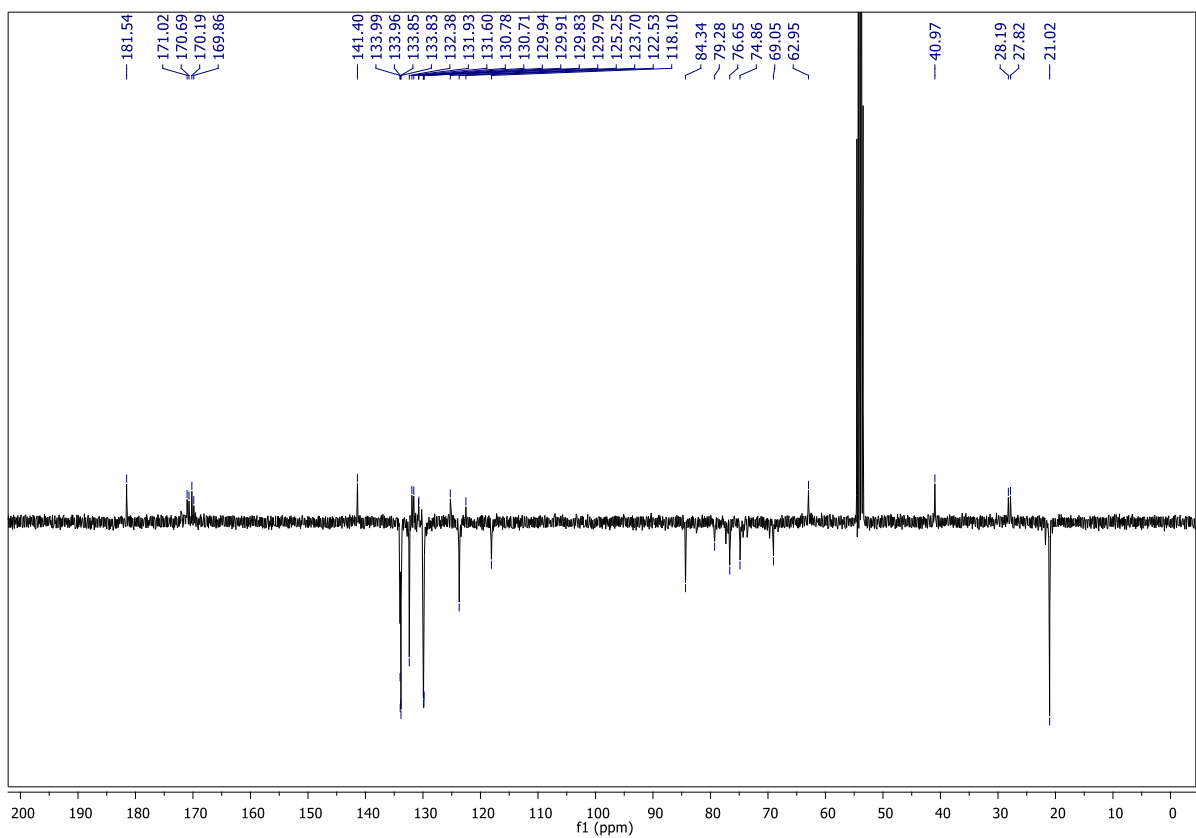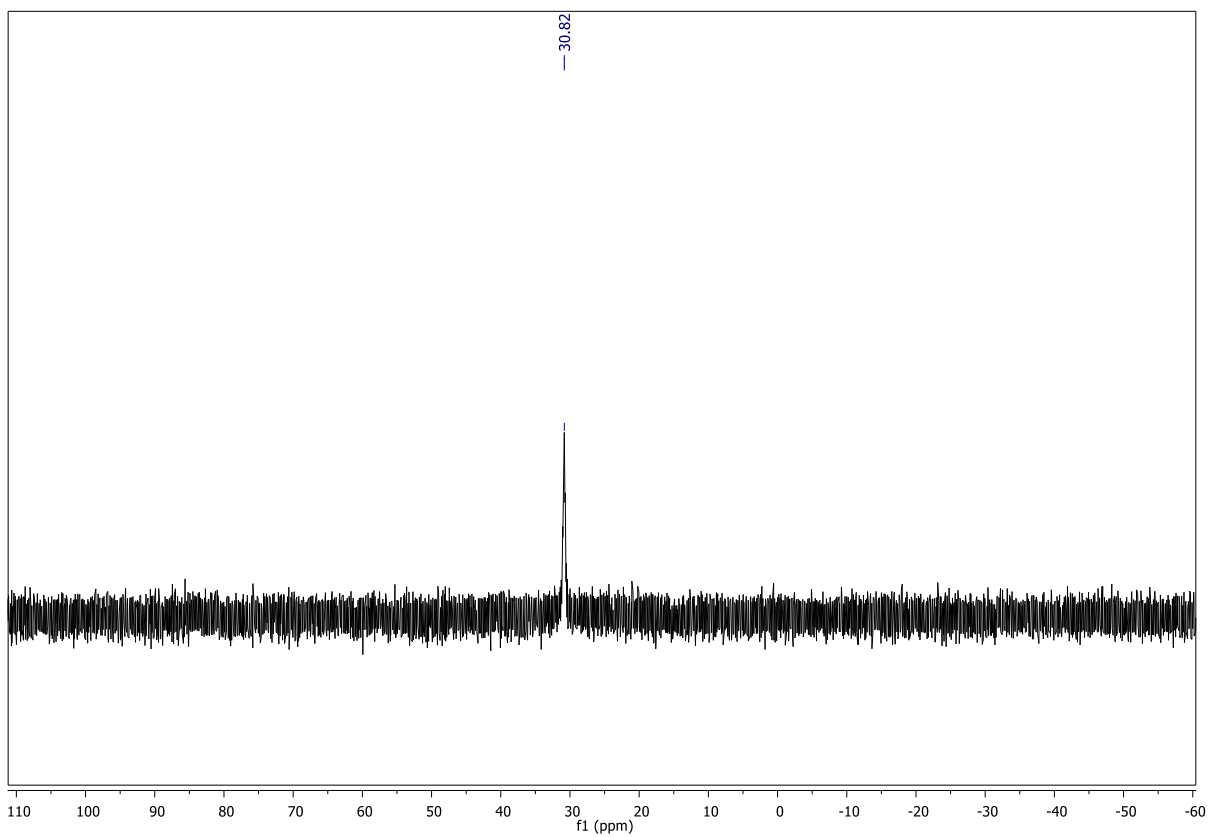

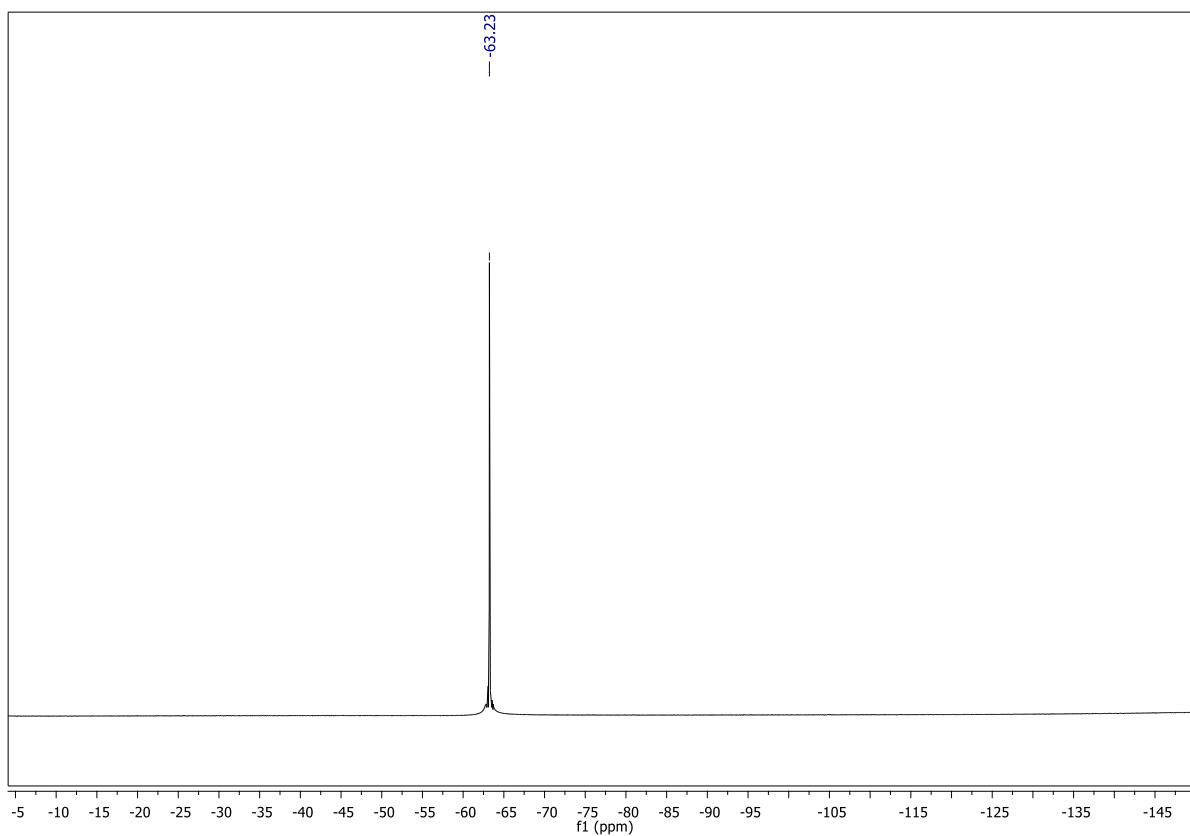

**Figure S8.** <sup>1</sup>H, <sup>13</sup>C-APT and <sup>31</sup>P{<sup>1</sup>H} NMR spectra (CD<sub>2</sub>Cl<sub>2</sub>) of **T2**.

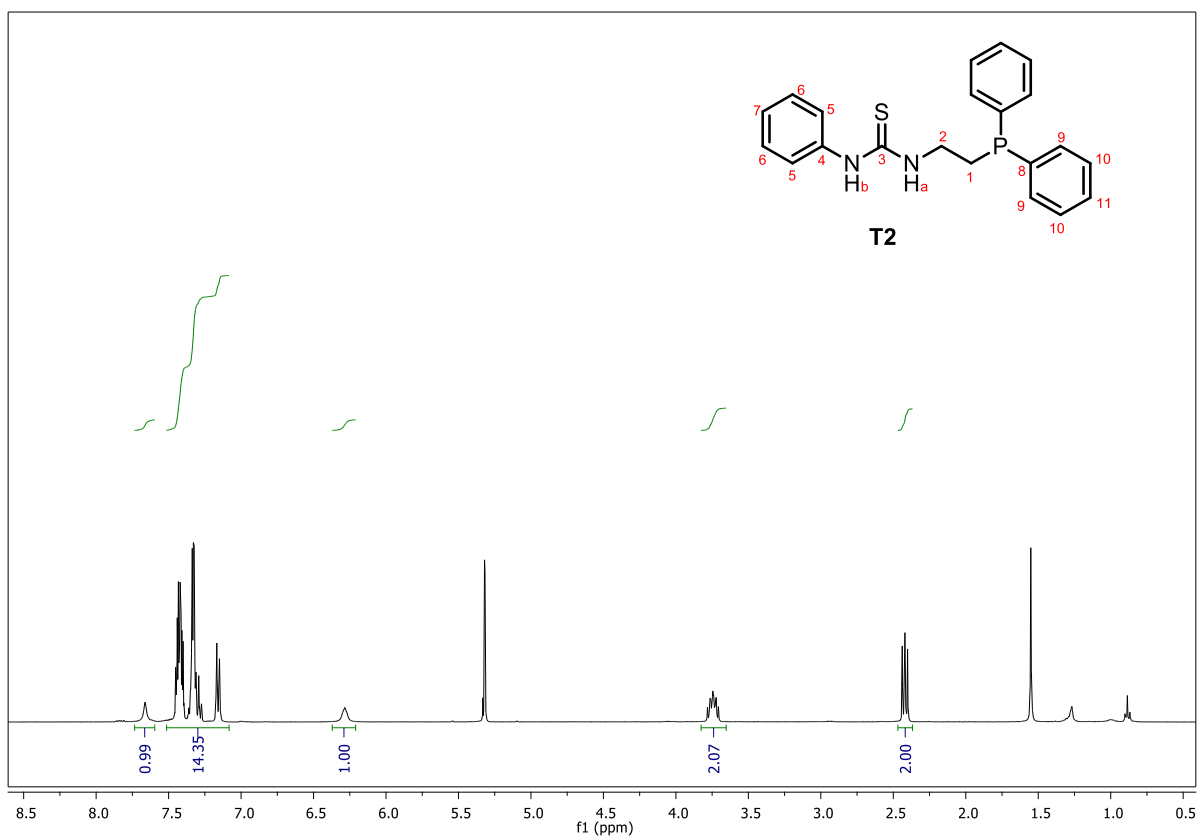

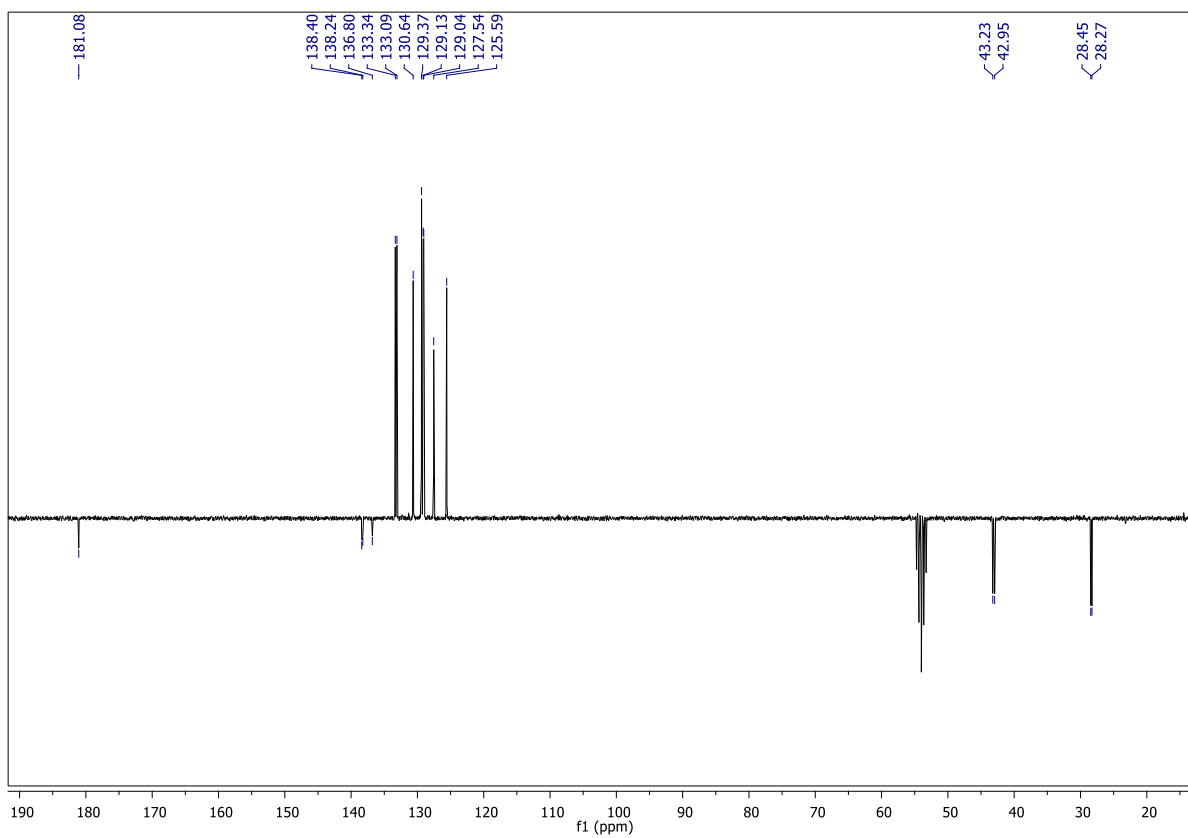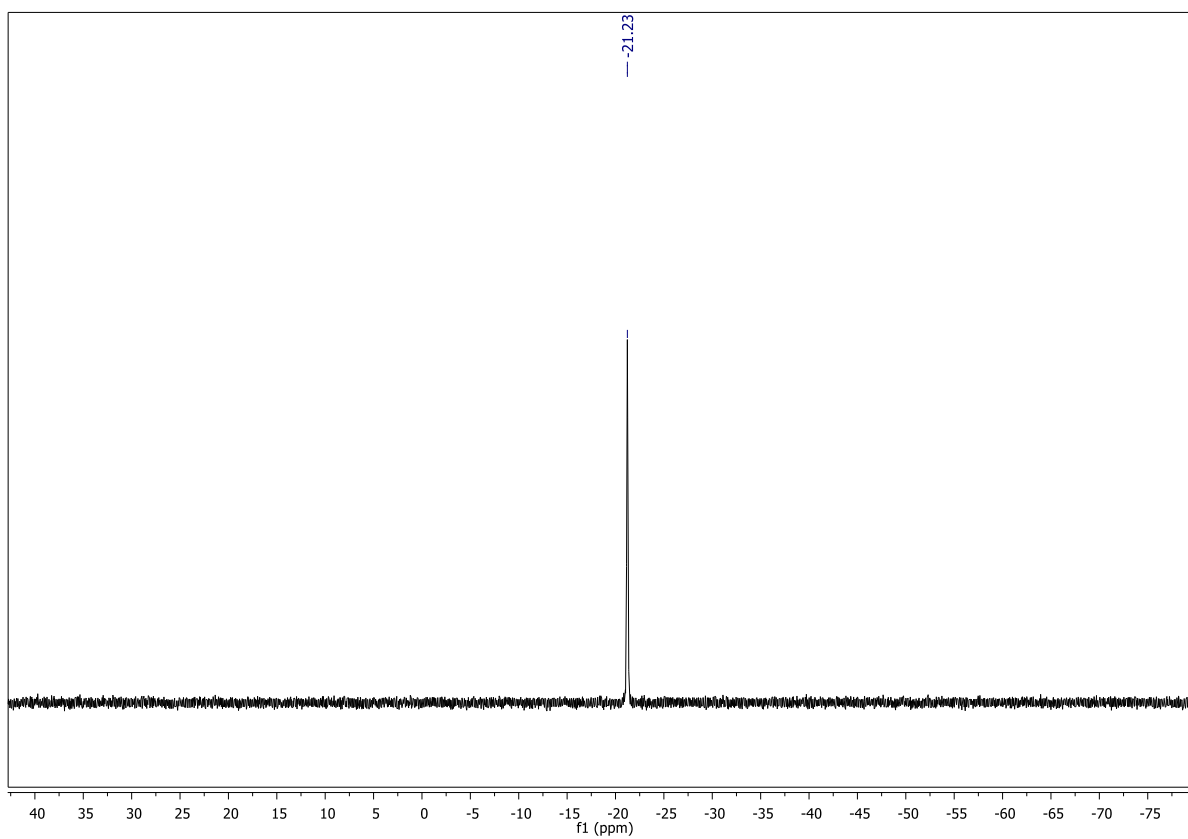

**Figure S9.**  $^1\text{H}$ ,  $^{13}\text{C}$ -APT,  $^{31}\text{P}\{^1\text{H}\}$  and  $^{19}\text{F}$  NMR spectra ( $\text{CD}_2\text{Cl}_2$ ) for complex **C2a**.

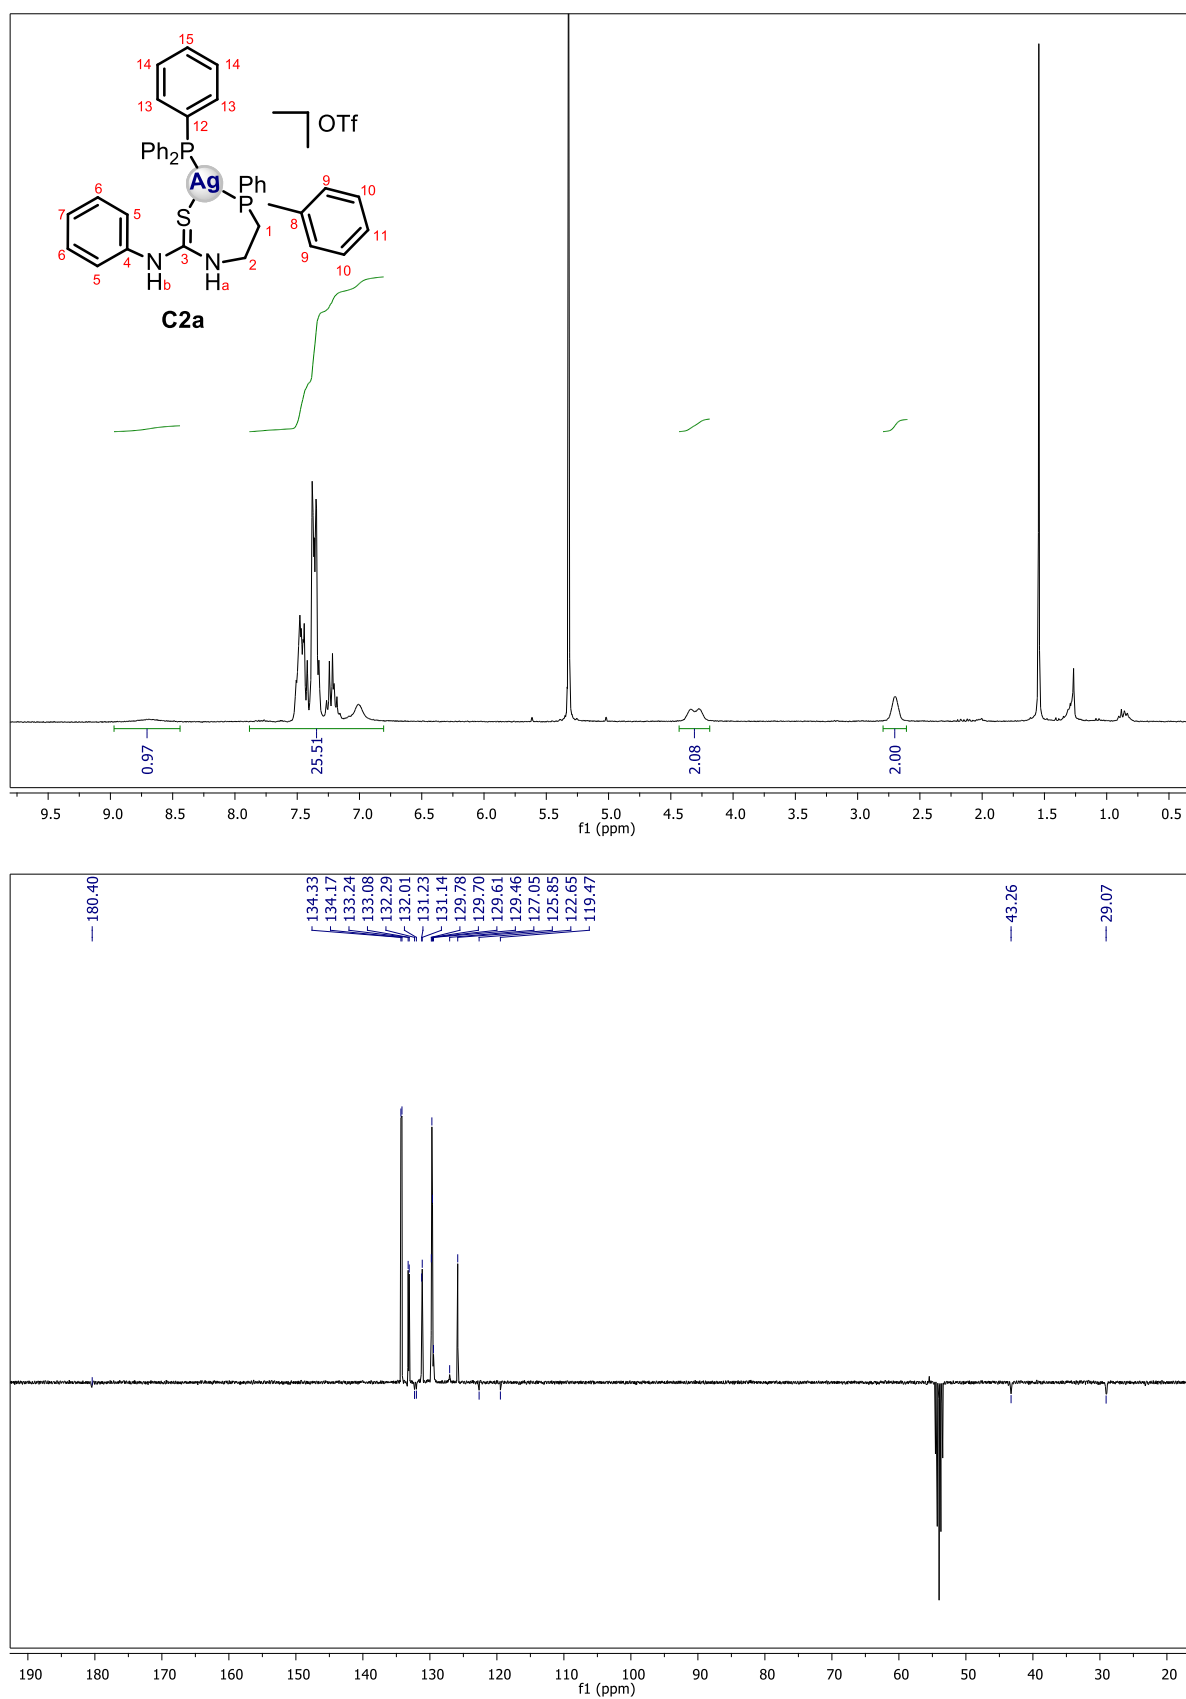



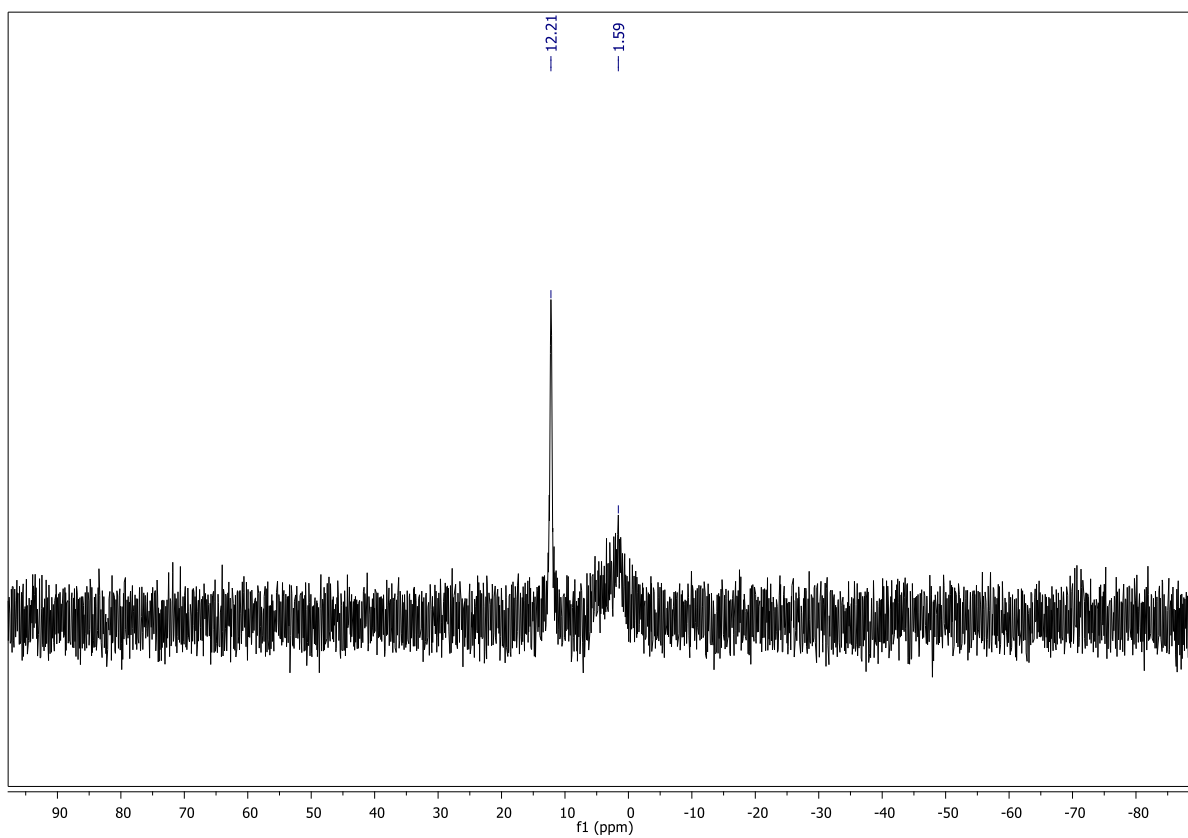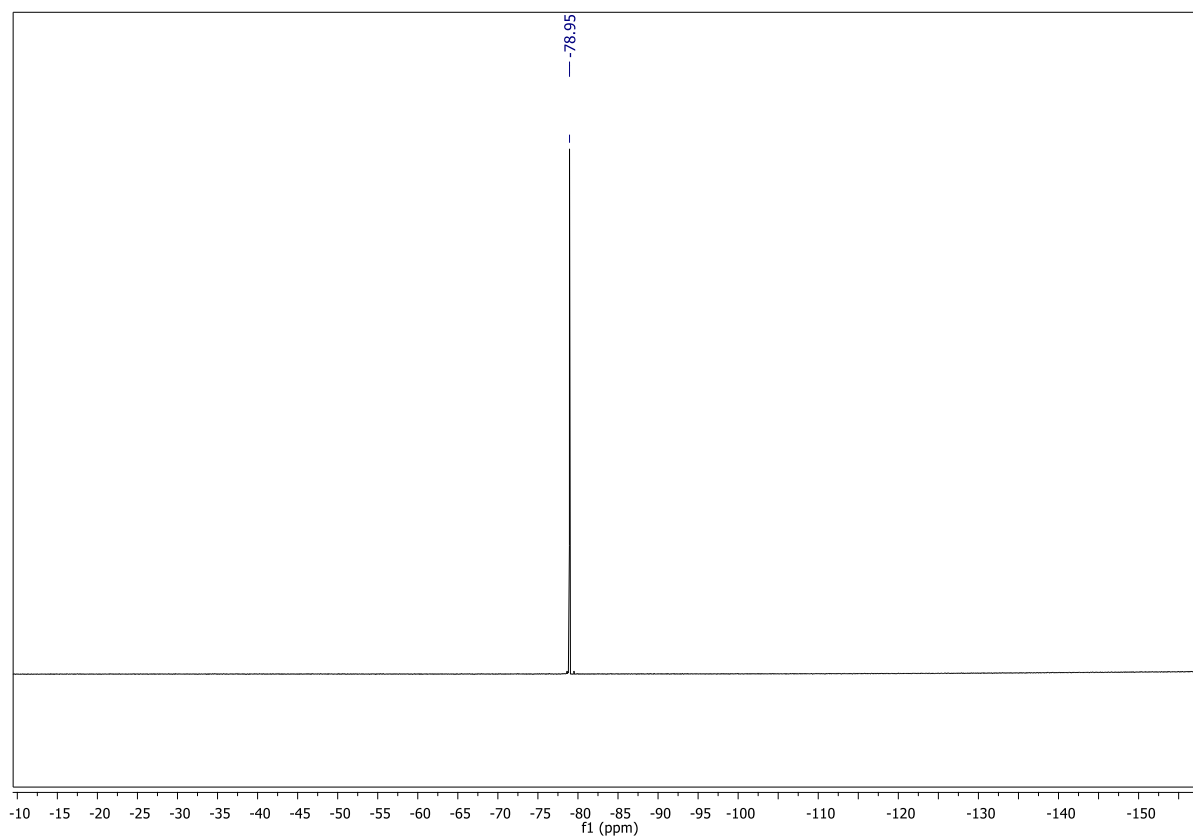

**Figure S10.**  $^1\text{H}$  NMR spectrum ( $\text{DMSO}-d_6$ ) for complex **C2a**.

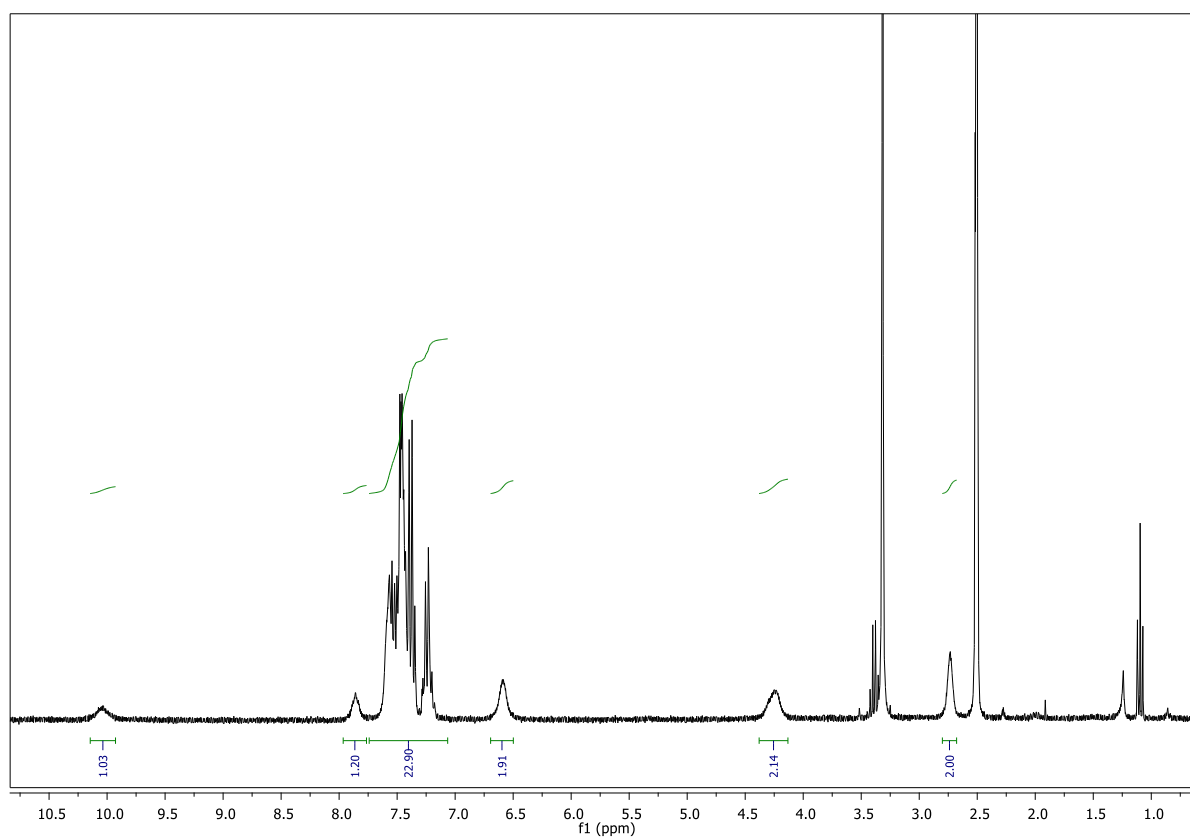

**Figure S11.**  $^1\text{H}$ ,  $^{13}\text{C}$ -APT,  $^{31}\text{P}\{^1\text{H}\}$  and  $^{19}\text{F}$  NMR spectra ( $\text{CD}_2\text{Cl}_2$ ) for complex **C2b**.

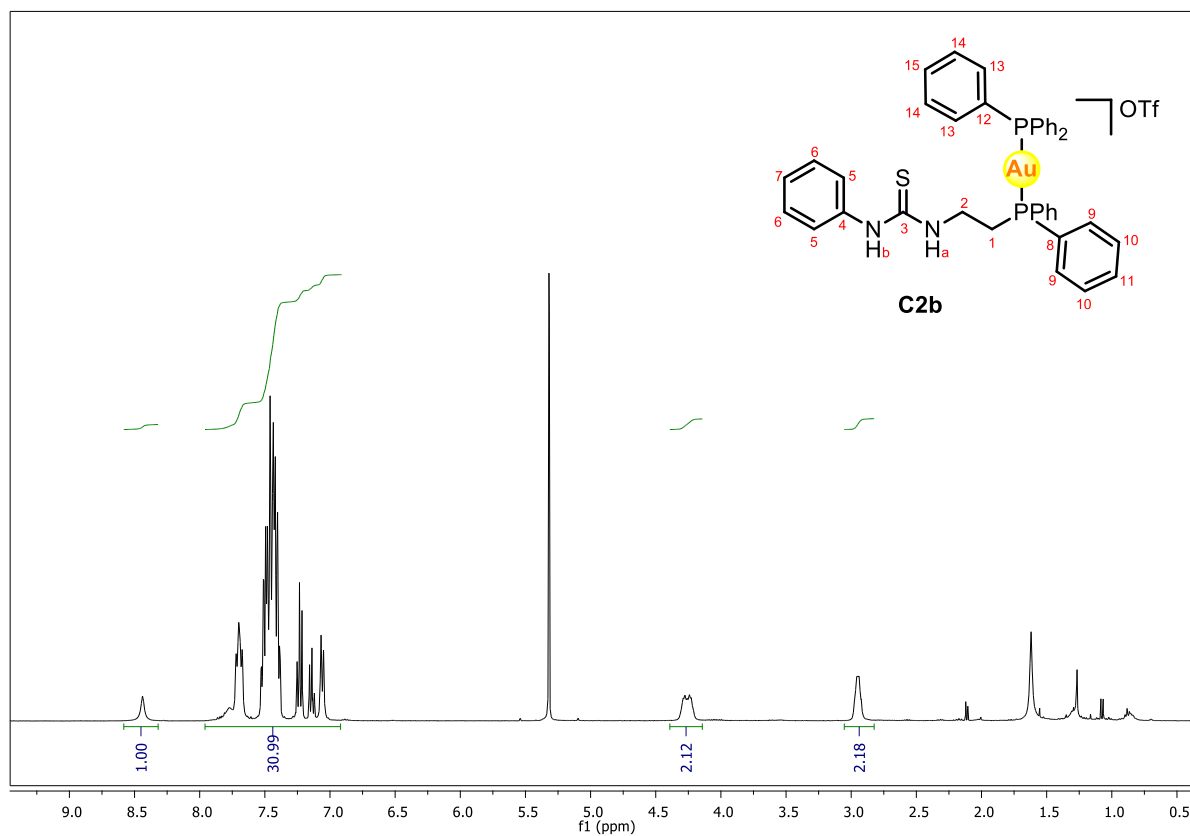

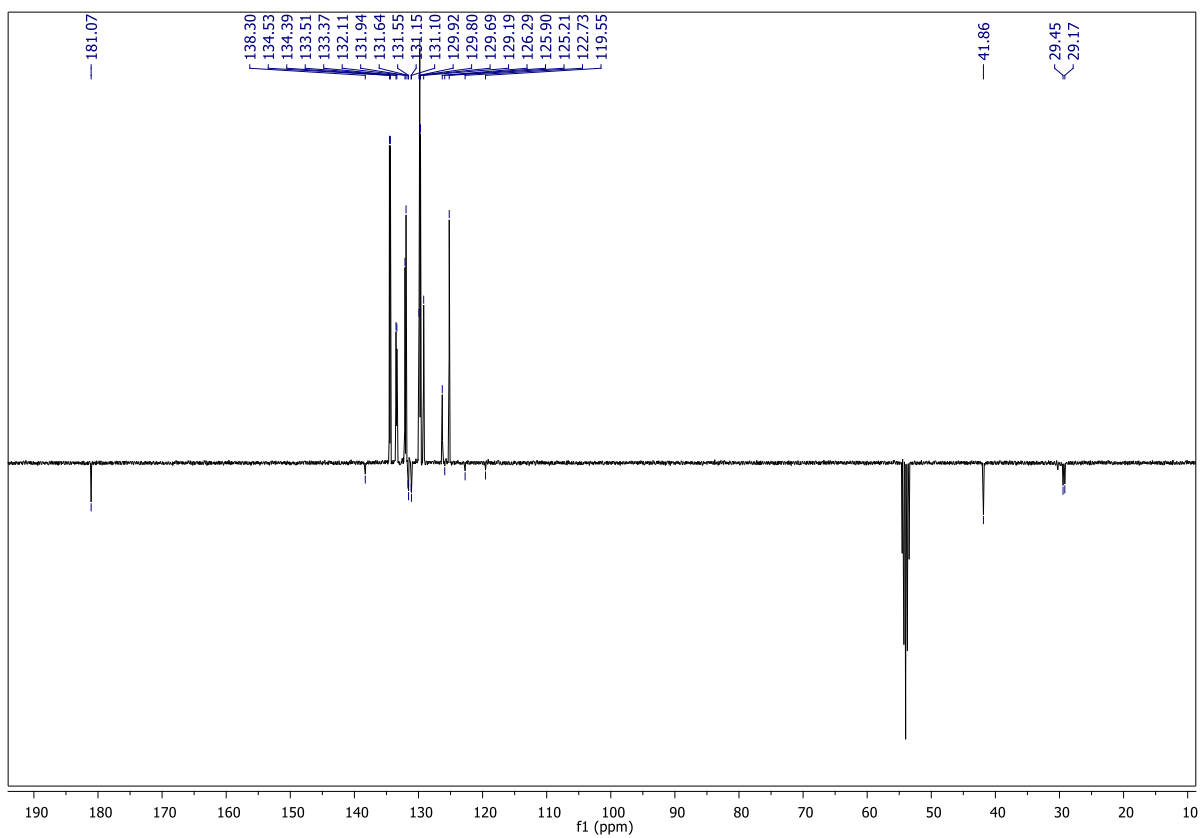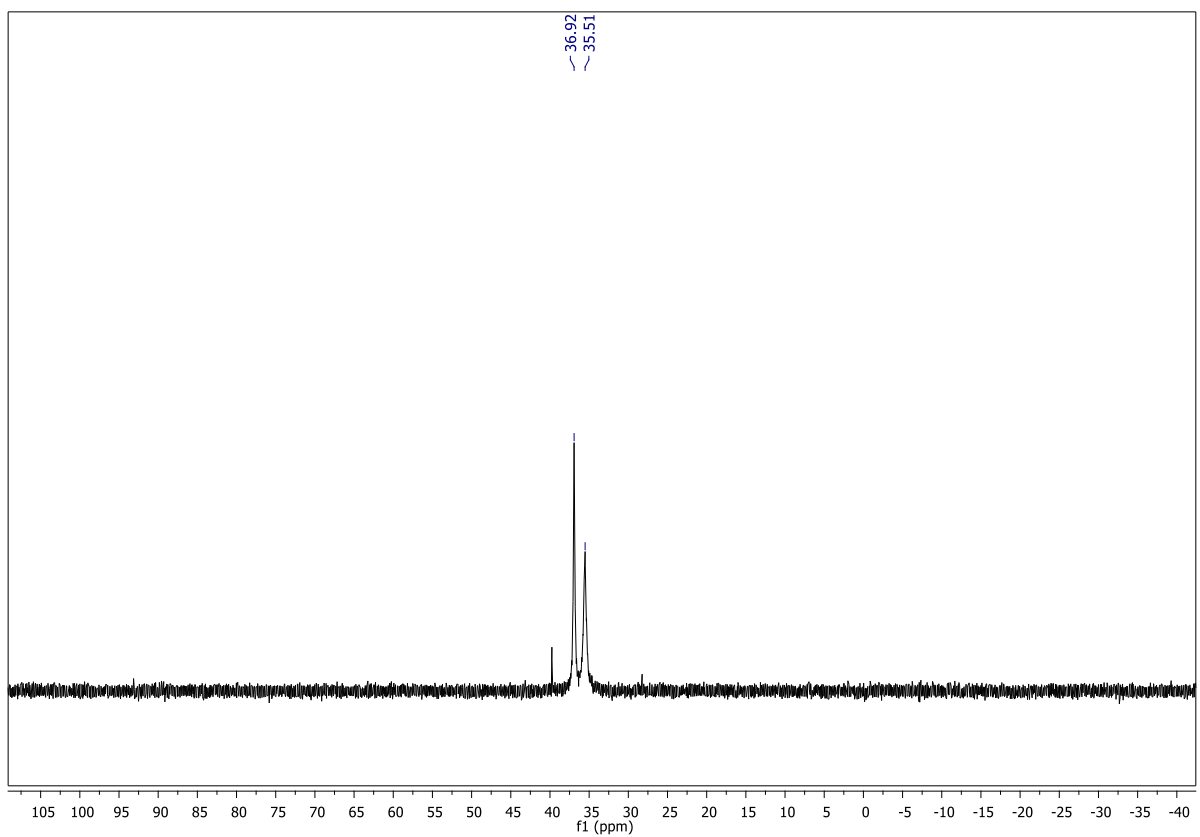

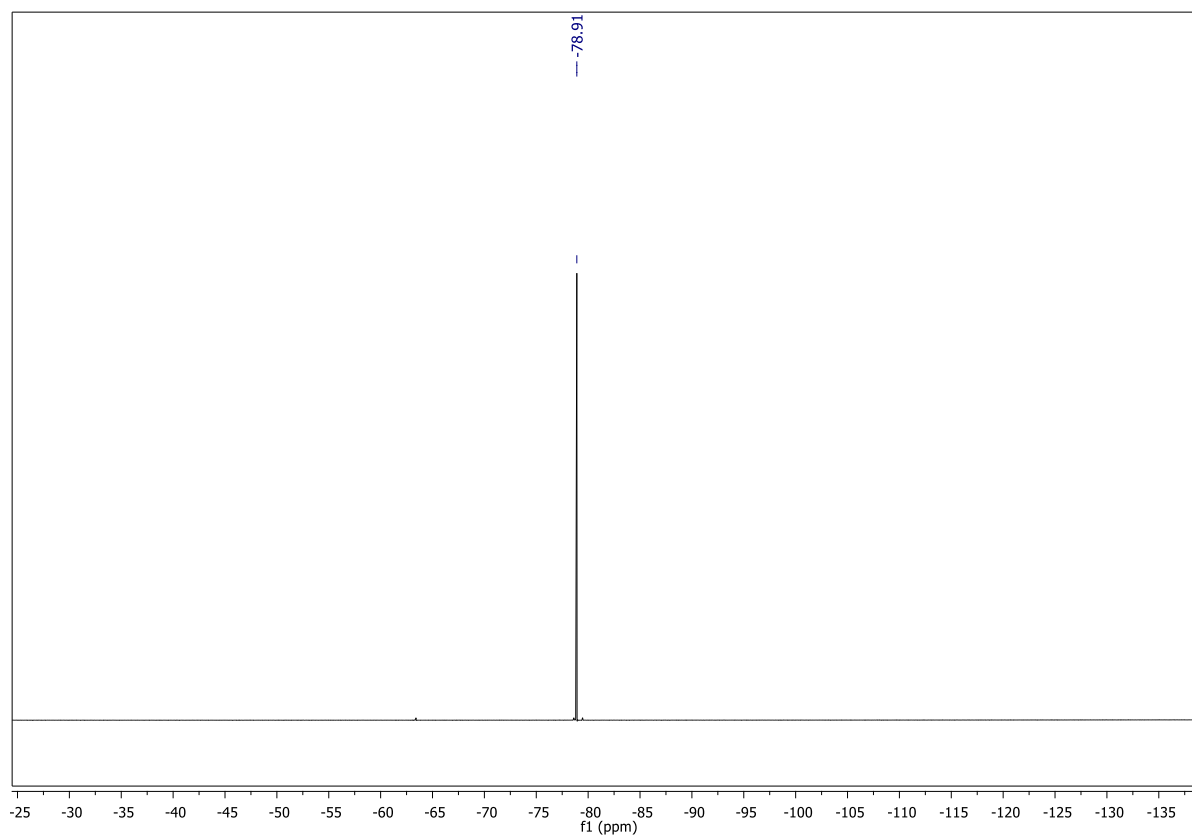

**Figure S12.**  $^1\text{H}$  NMR spectrum ( $\text{DMSO-}d_6$ ) for complex **C2b**.

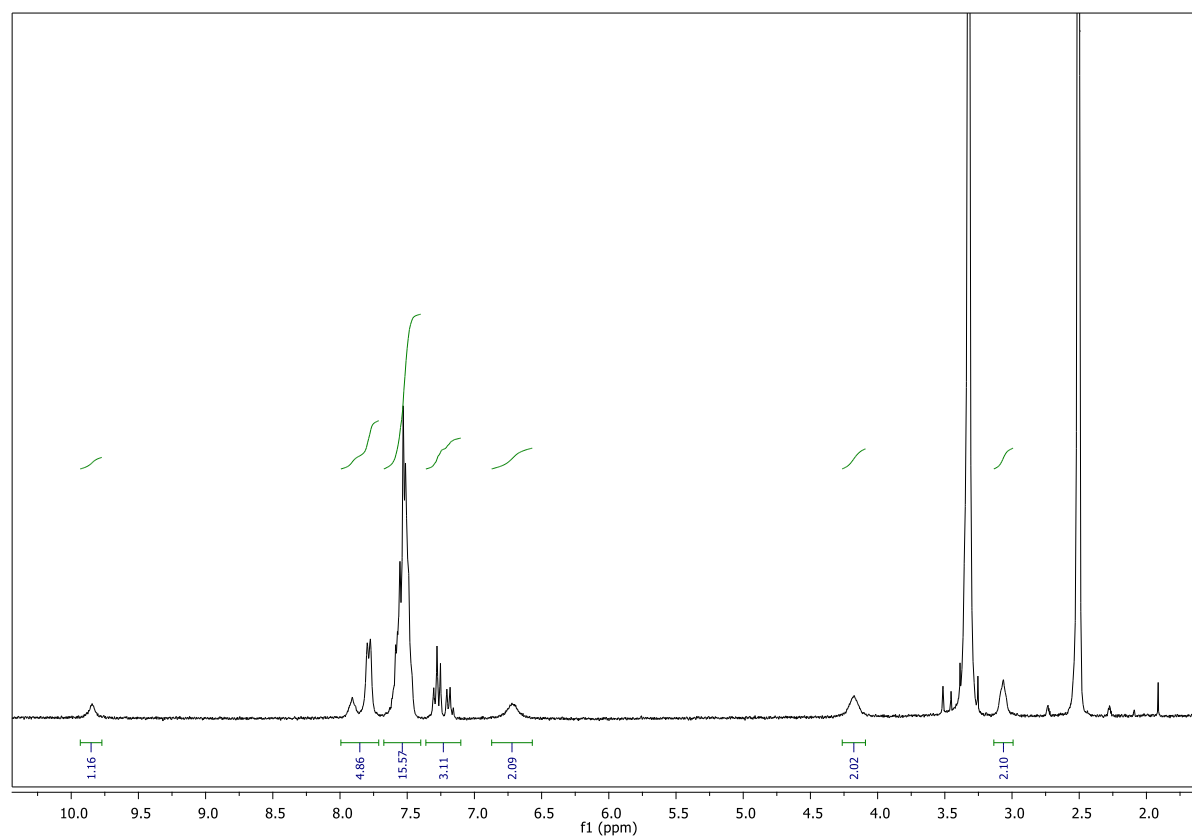

**Figure S13.**  $^1\text{H}$ ,  $^{13}\text{C}$ -APT,  $^{31}\text{P}\{^1\text{H}\}$  and  $^{19}\text{F}$  NMR spectra (DMSO- $d_6$ ) for complex **C2c**.

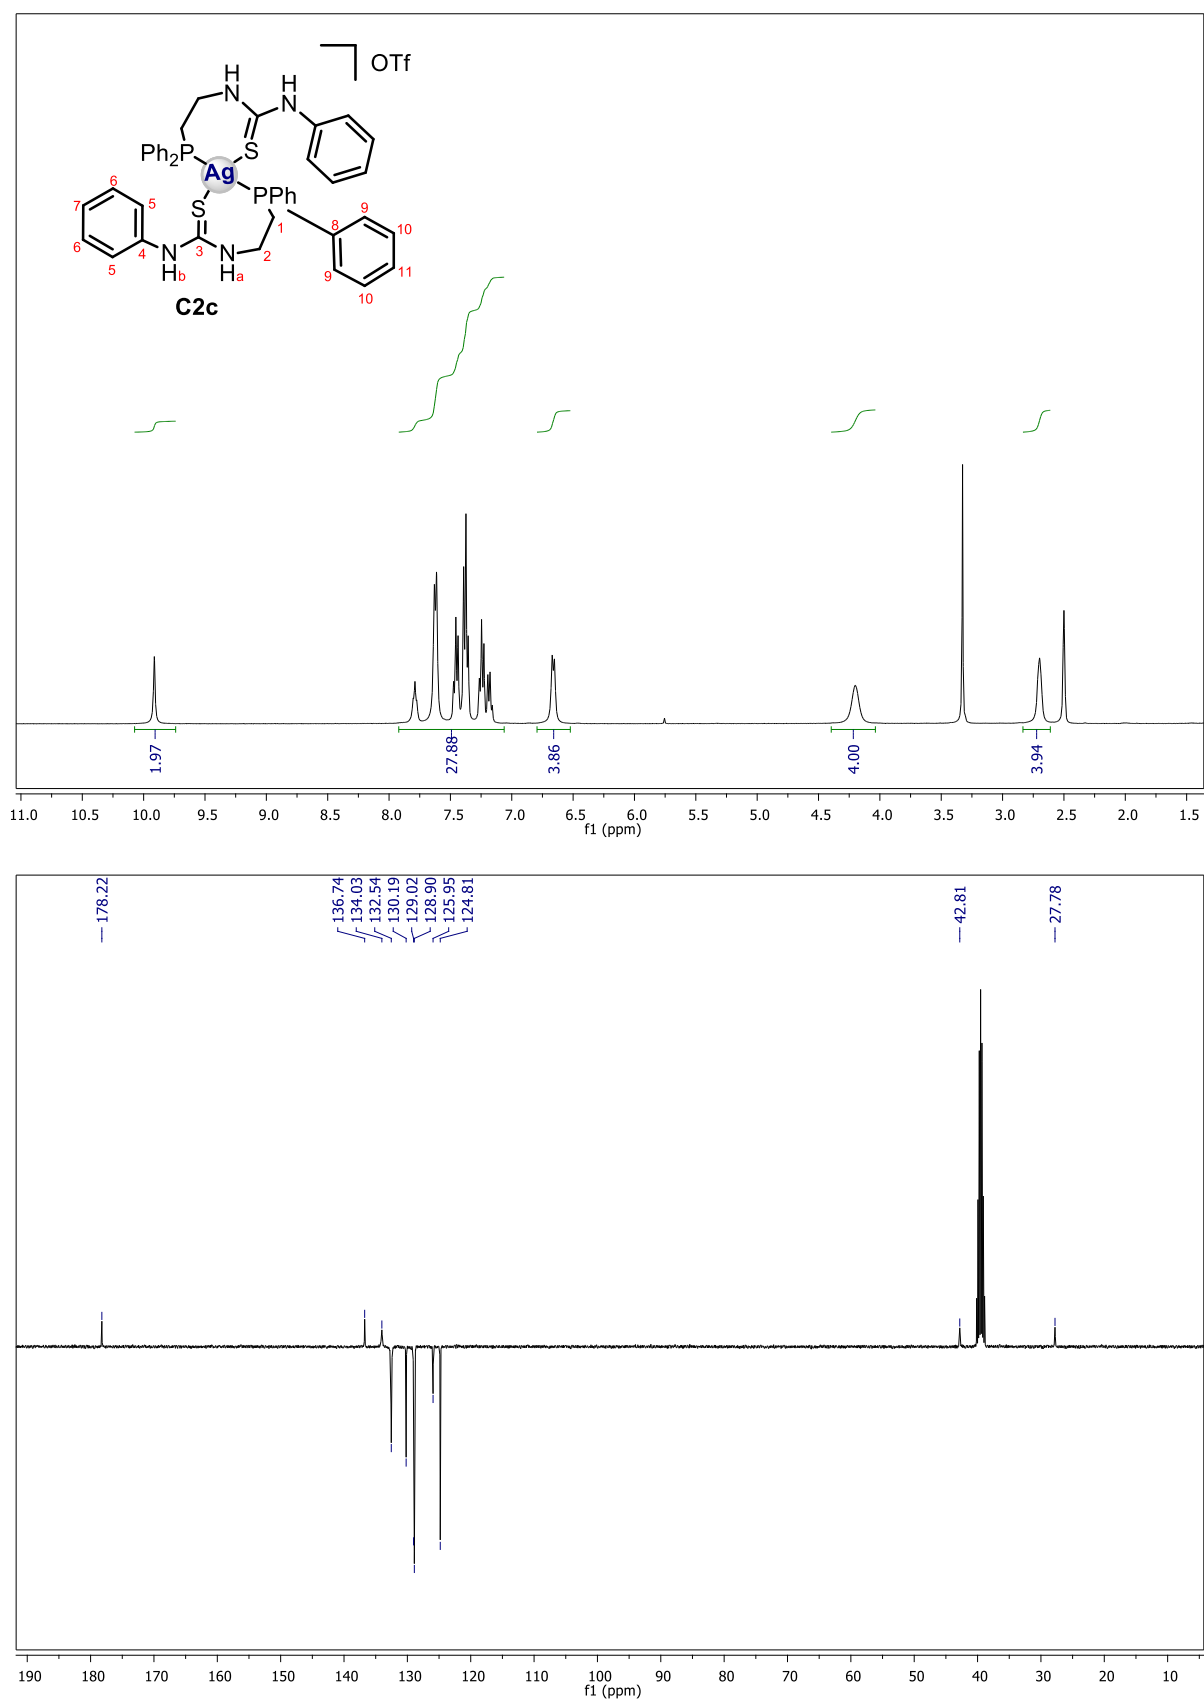

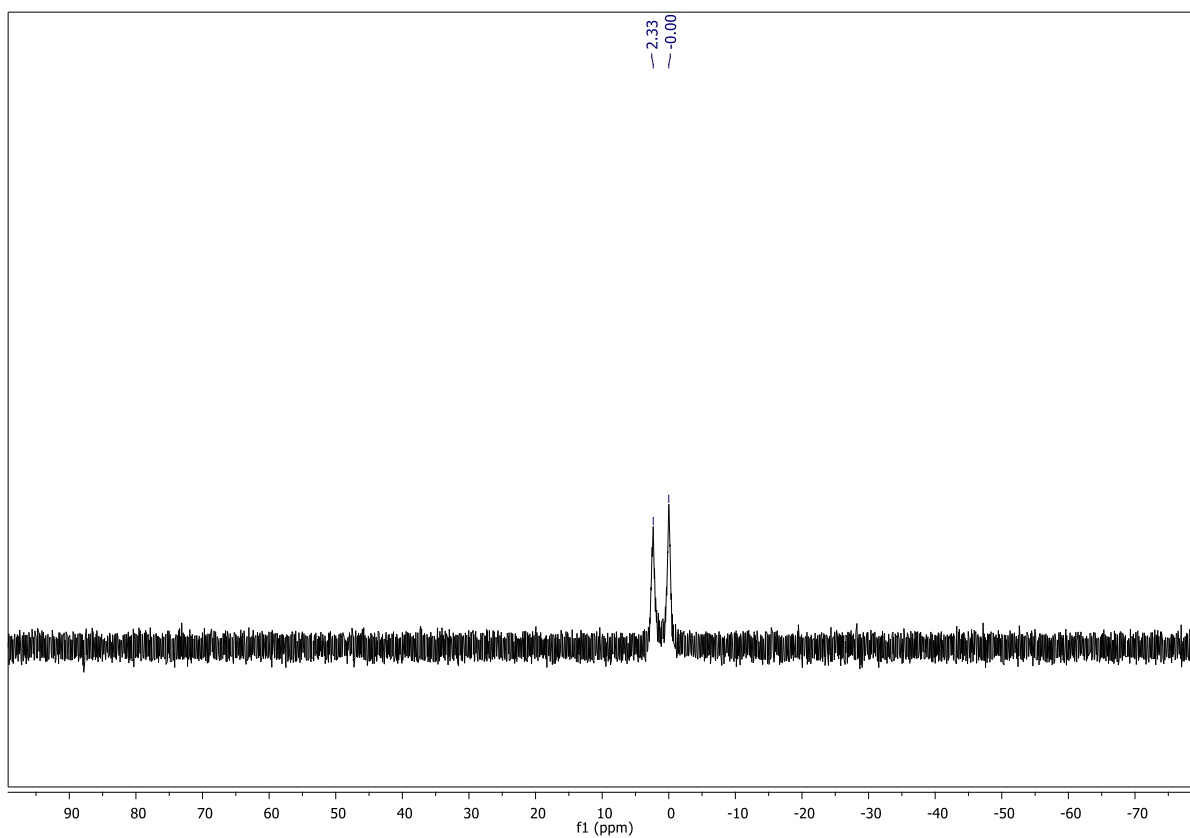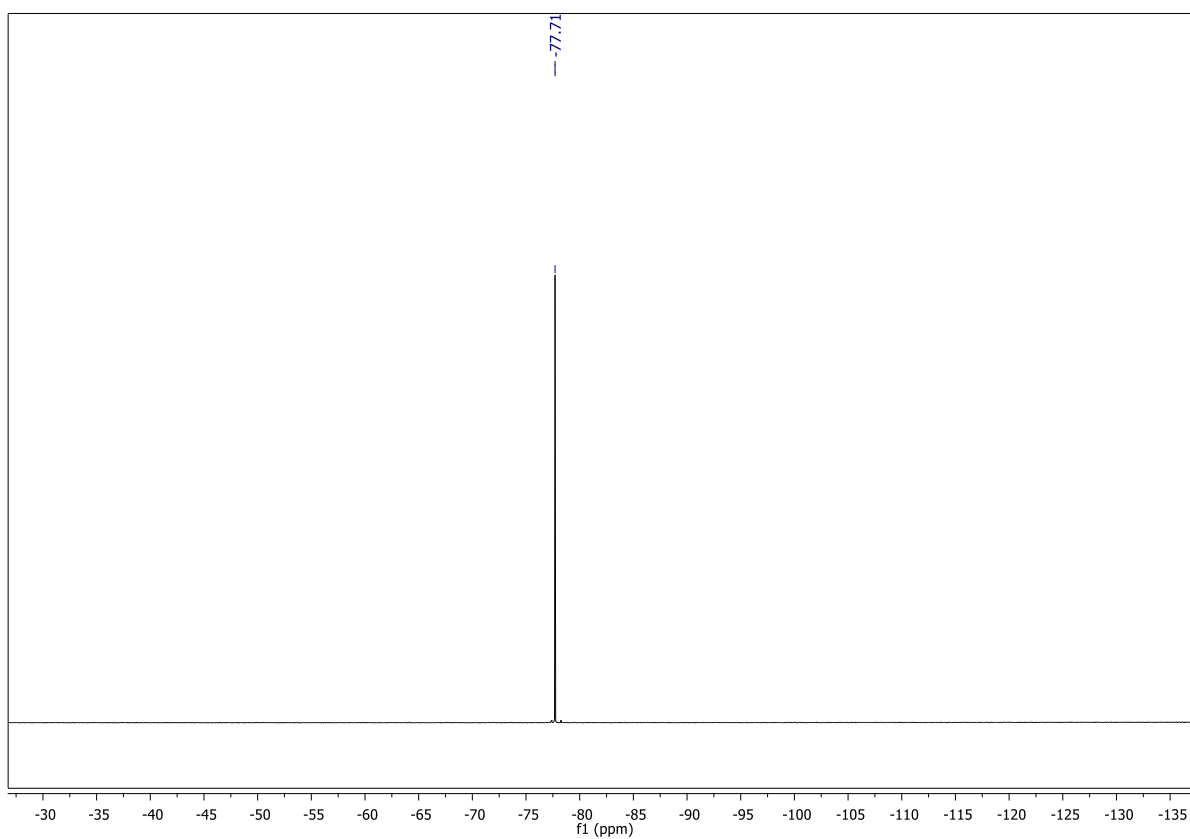

**Figure S14.**  $^{31}\text{P}\{^1\text{H}\}$  NMR spectrum ( $\text{CD}_2\text{Cl}_2$ ) at 193 K for complex **C1a**.

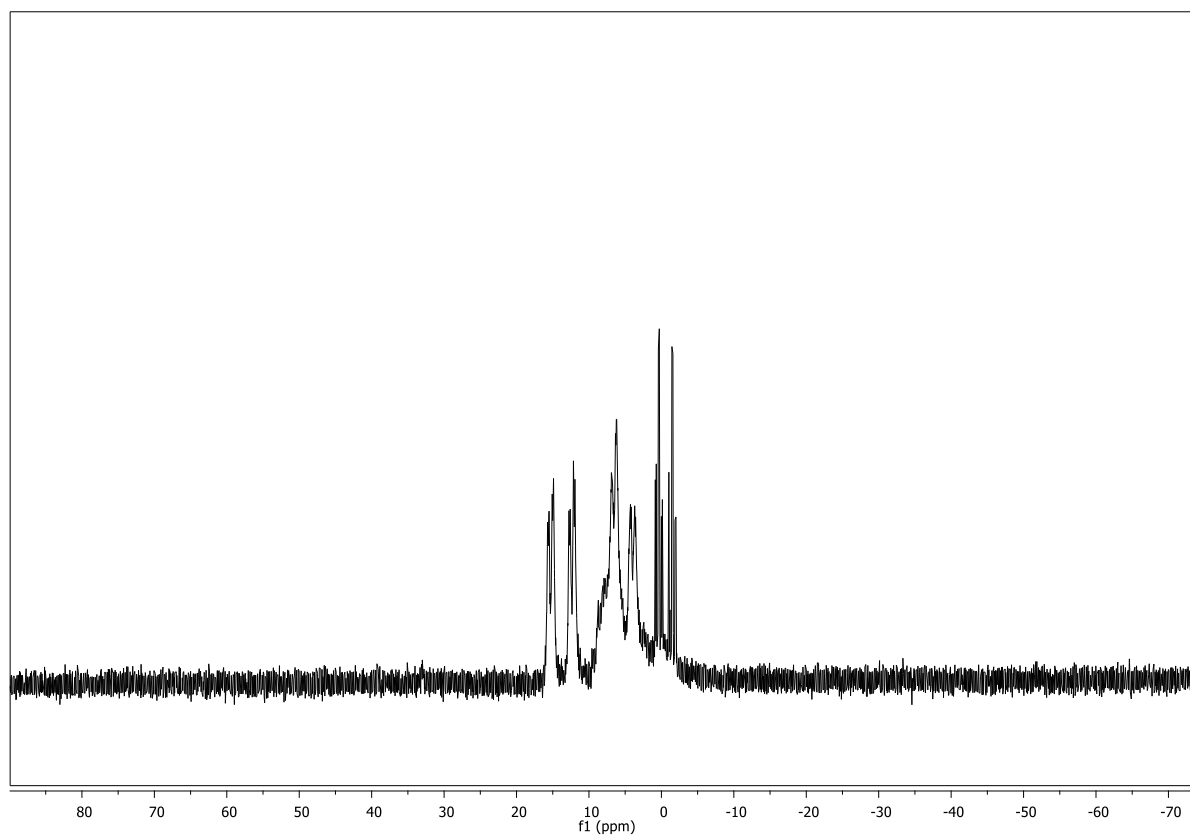

**Figure S15.**  $^{31}\text{P}\{^1\text{H}\}$  NMR spectrum ( $\text{CD}_2\text{Cl}_2$ ) at 193 K for complex **C1b**.

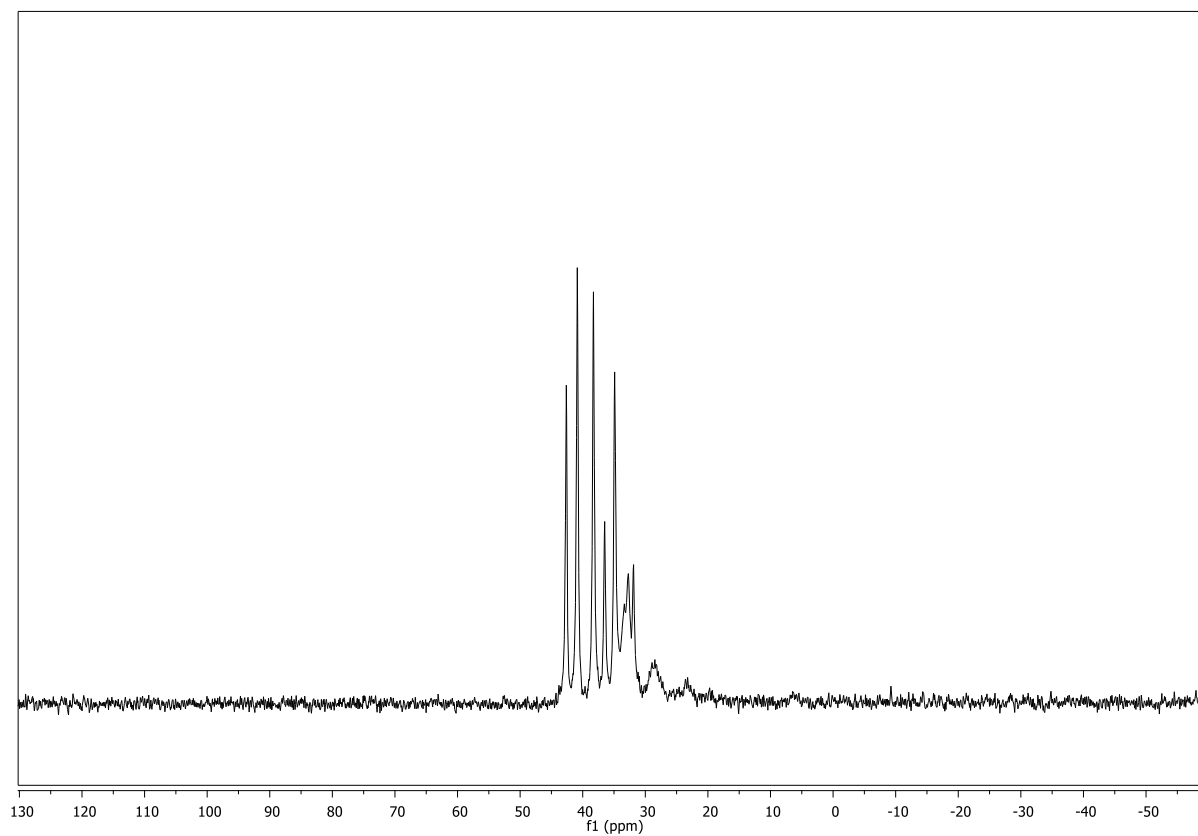

**Figure S16.**  $^{31}\text{P}\{^1\text{H}\}$  NMR spectrum ( $\text{CD}_2\text{Cl}_2$ ) at 193 K for complex **C1c**.

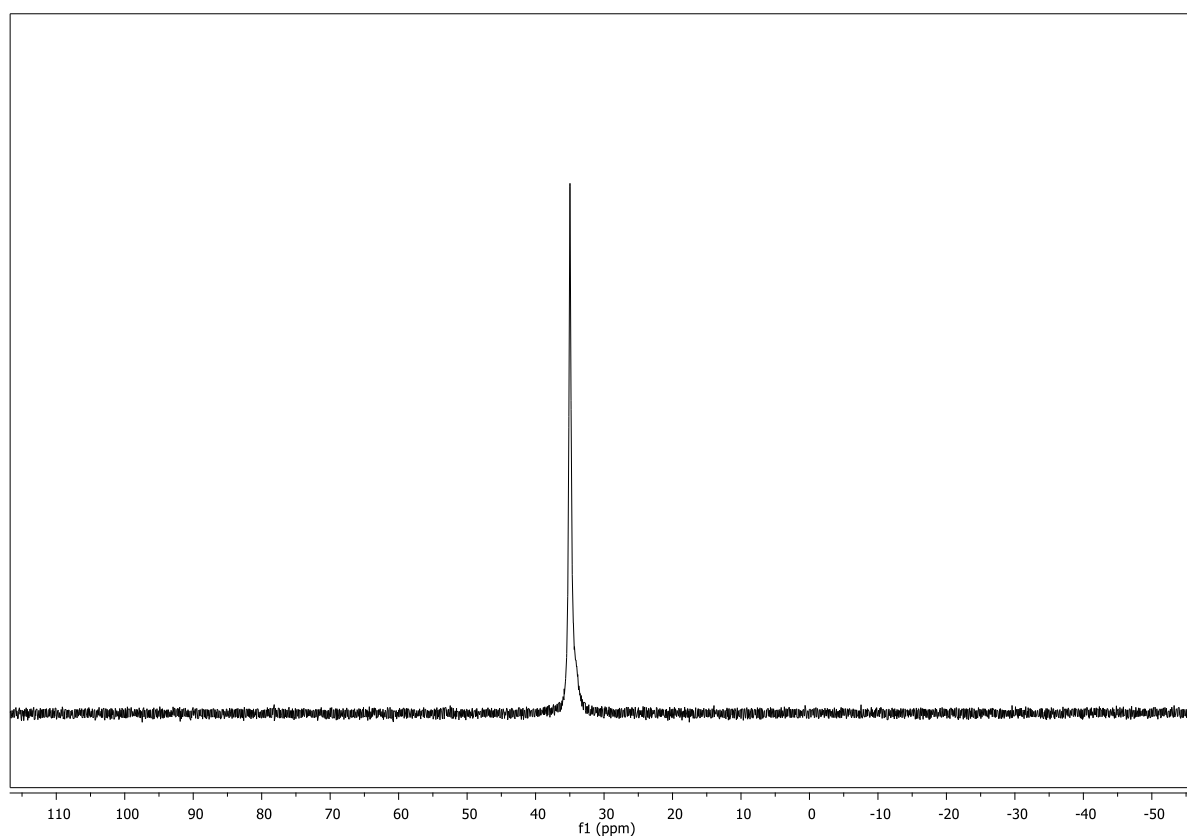

**Figure S17.** HSQC and COSY NMR spectra of **C2c** to explain the correlation among protons and proton-carbon on C1 and C2.

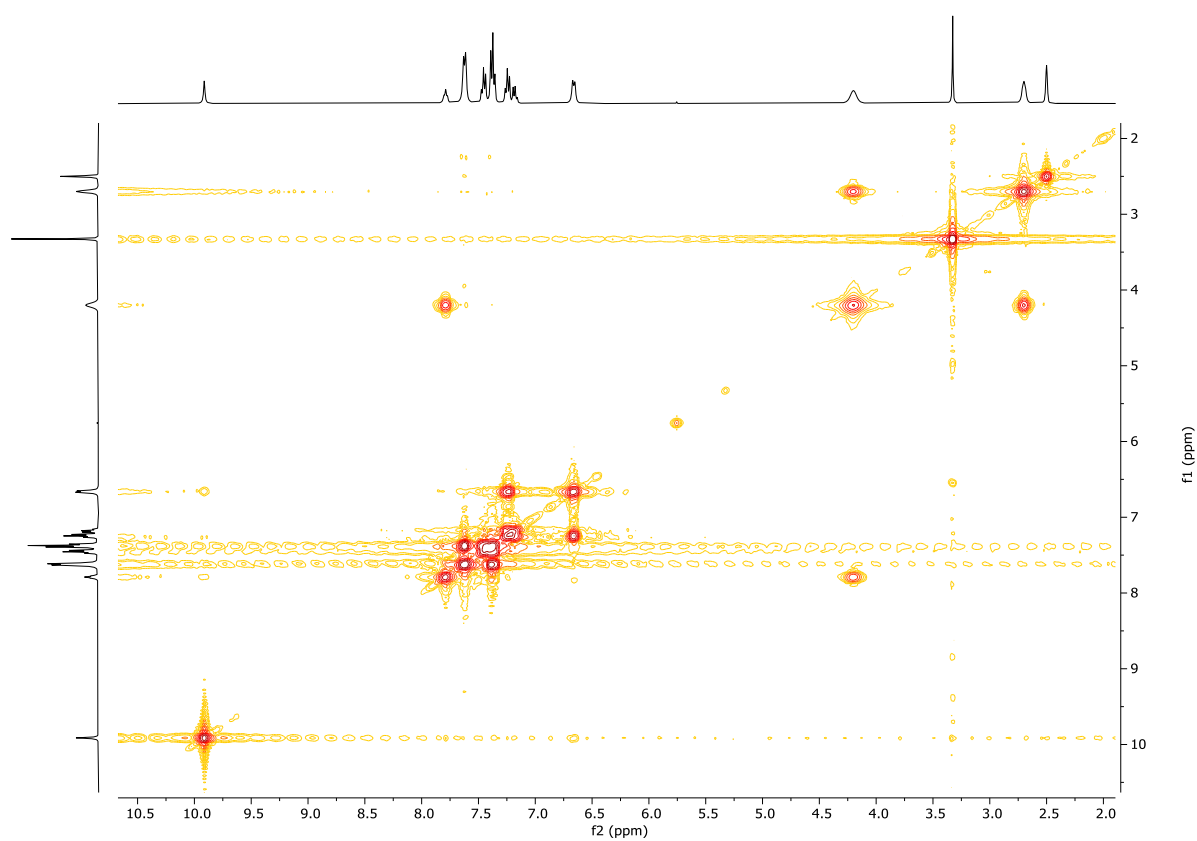



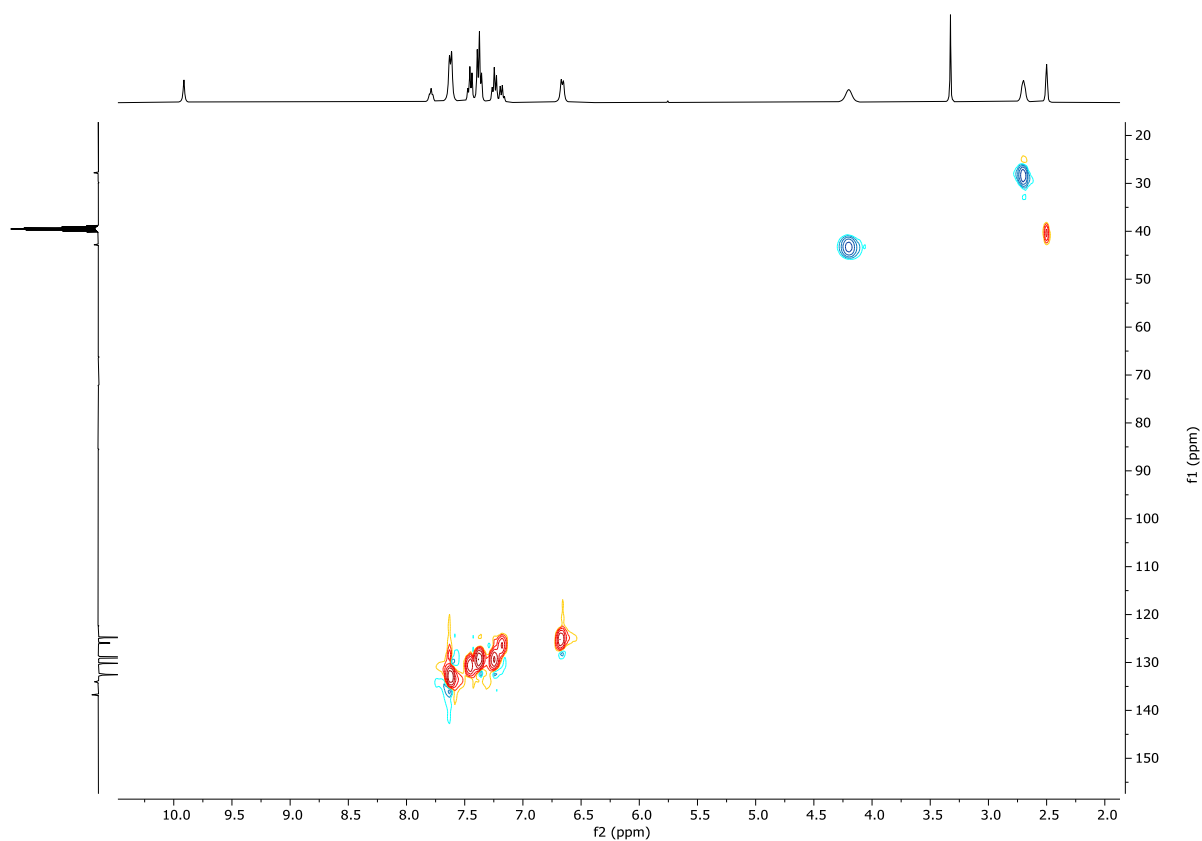

Explanation:

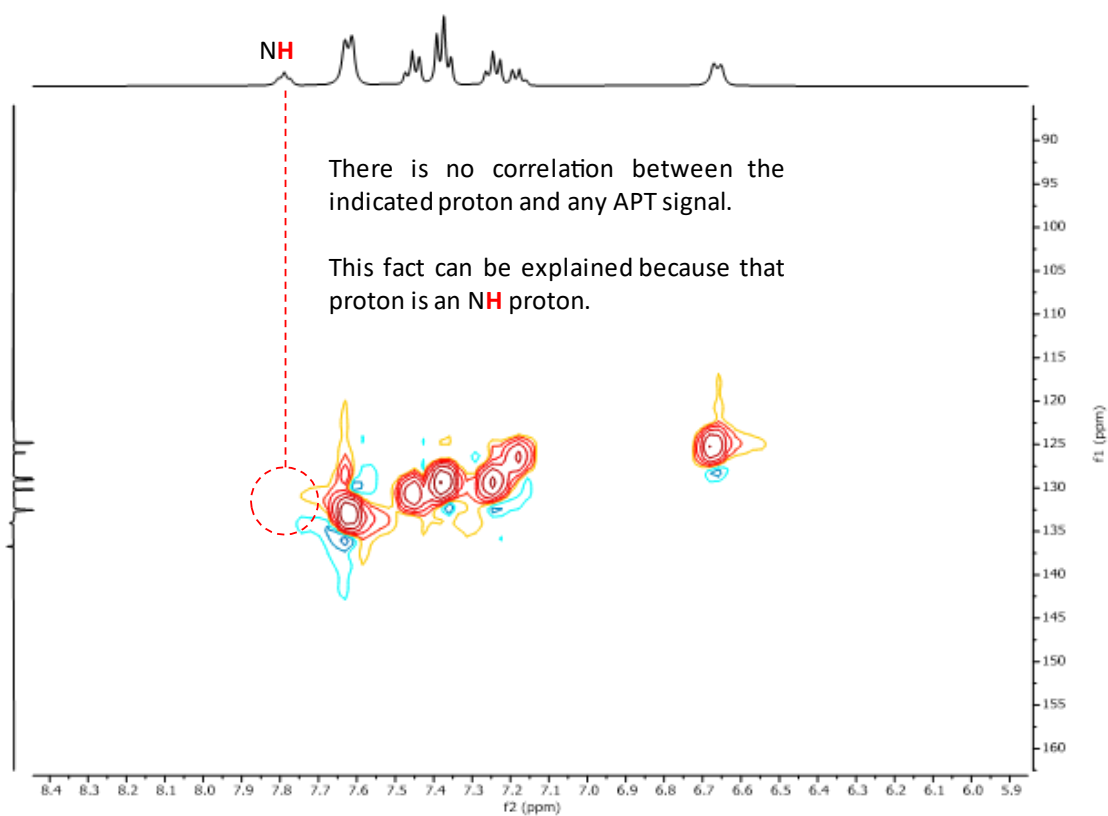

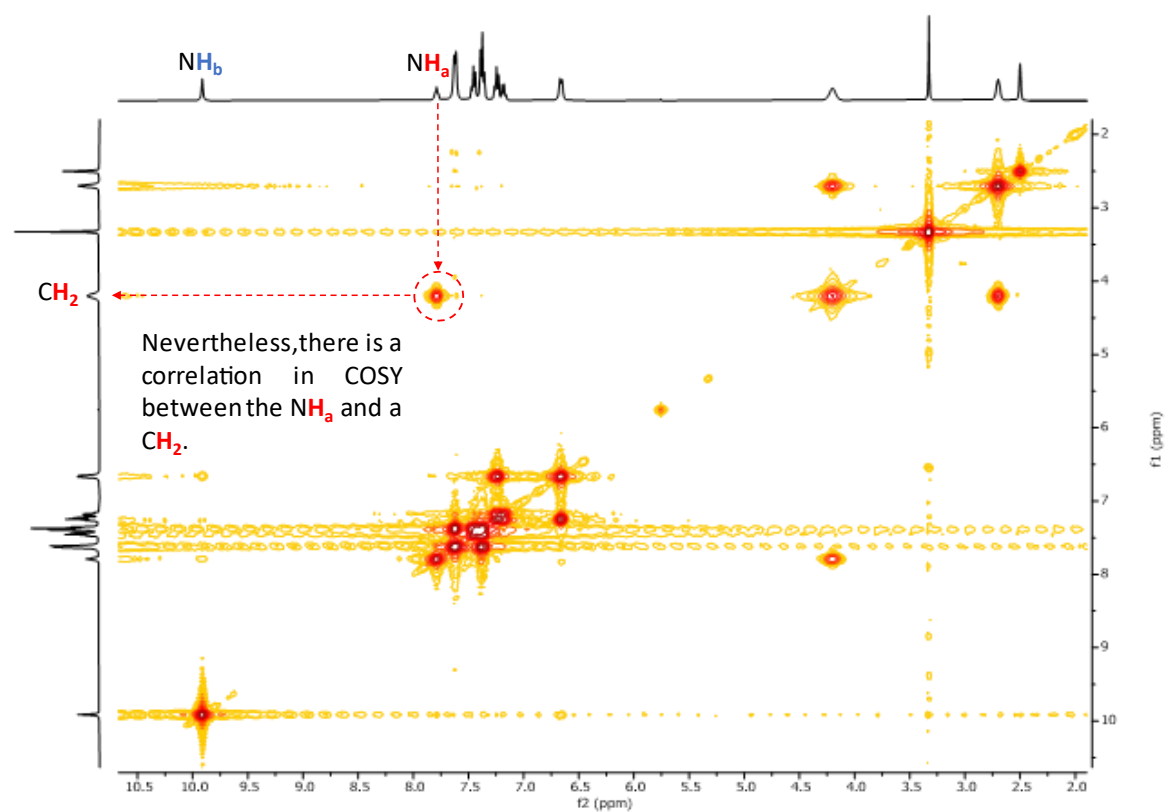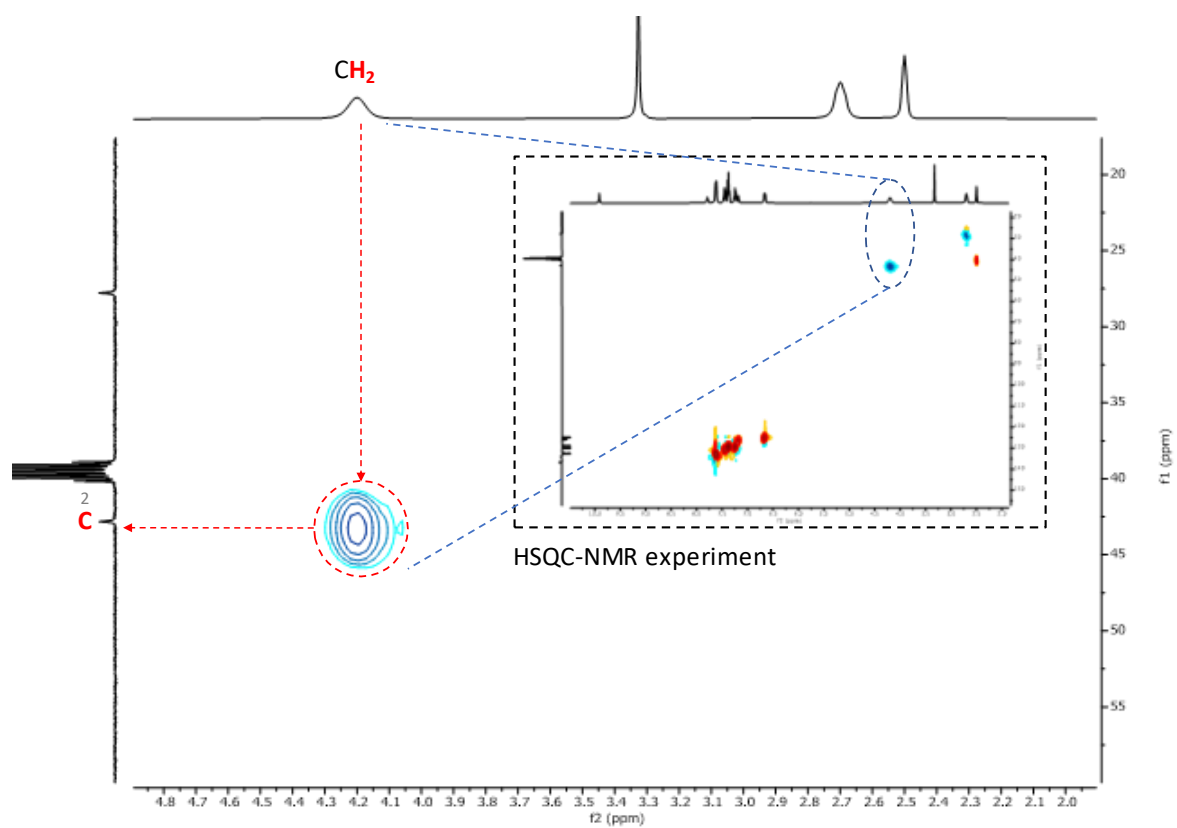

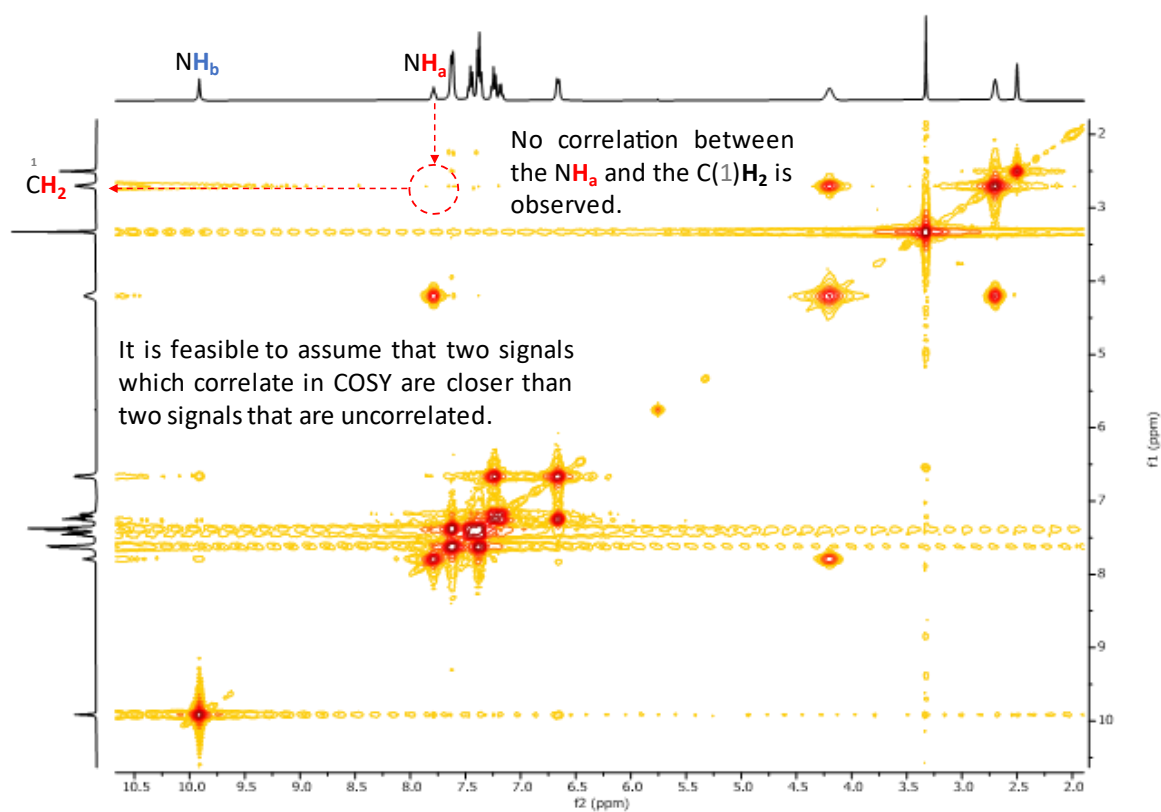

**Figure S18.** HSQC and COSY NMR spectra of **C2b** to explain the correlation among protons and proton-carbon on C1 and C2.

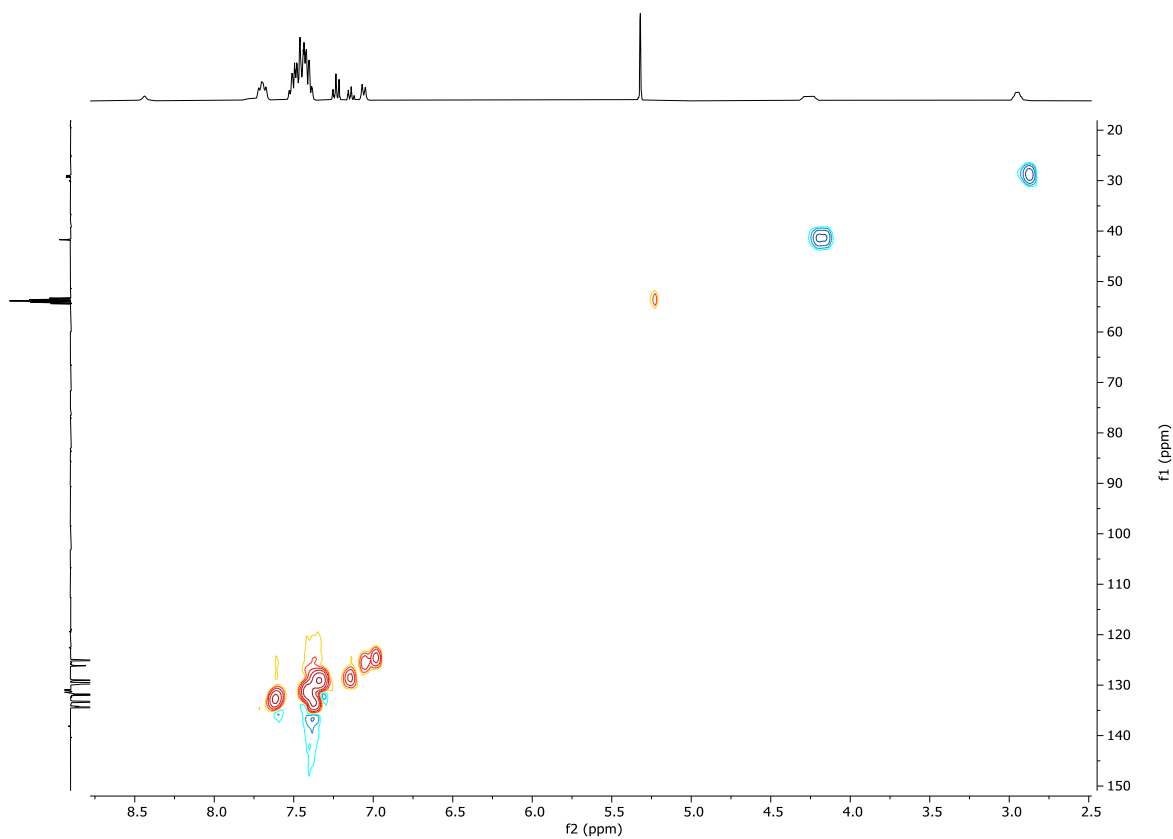

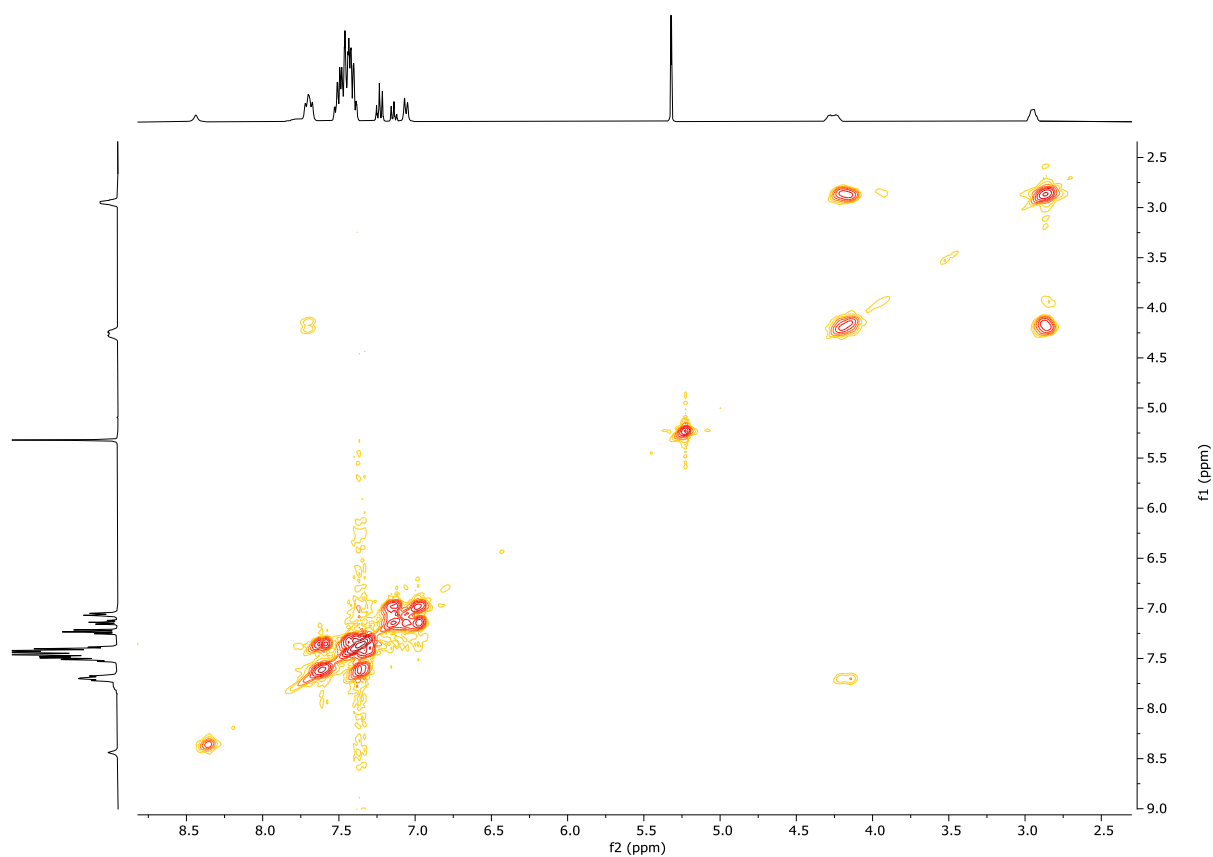

**Figure S19.** ESI-mass for all compounds

**T1**

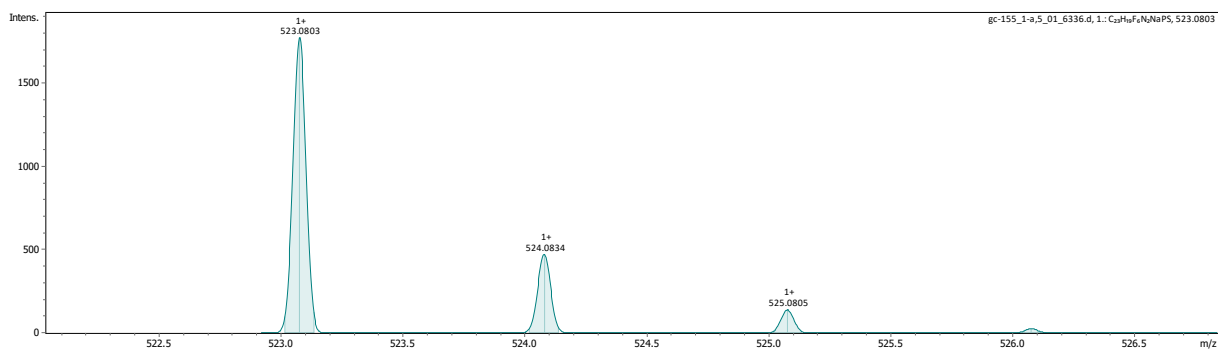

**C1a**

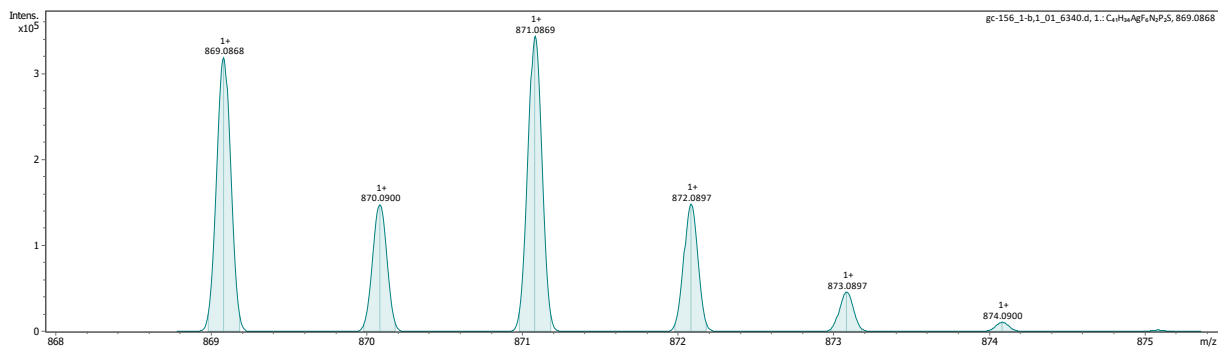

## C1b

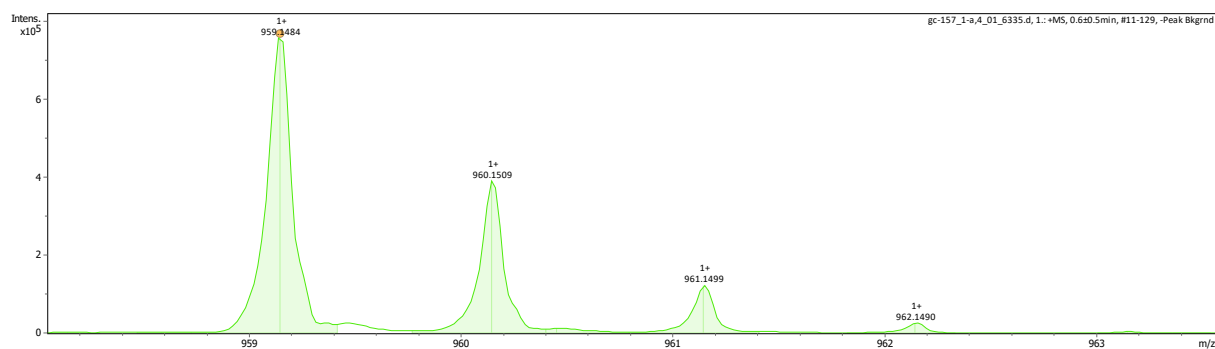

## C1c

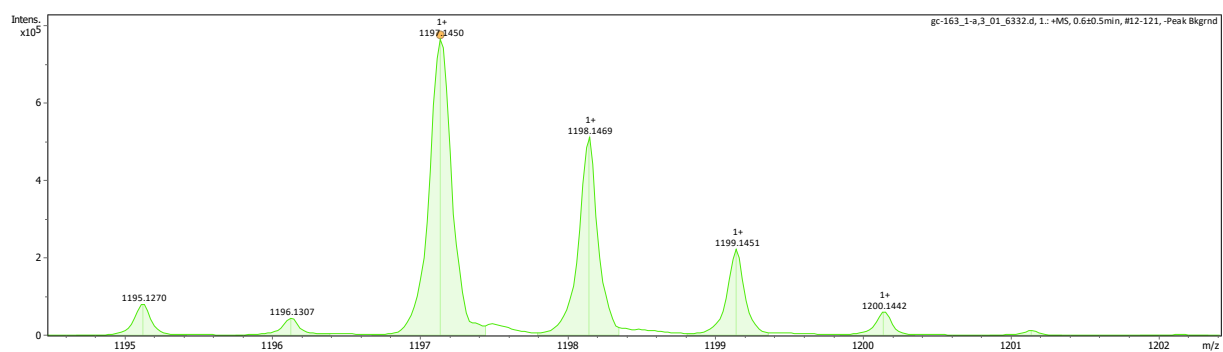

## C1d

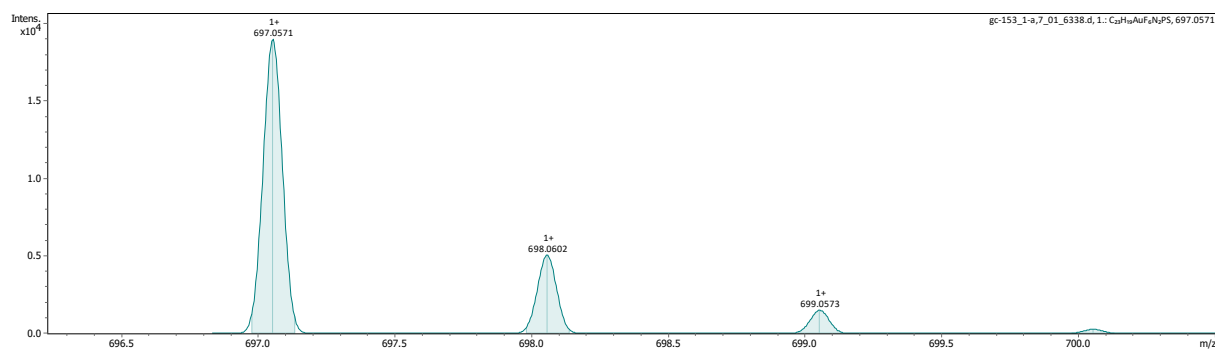

## C1e

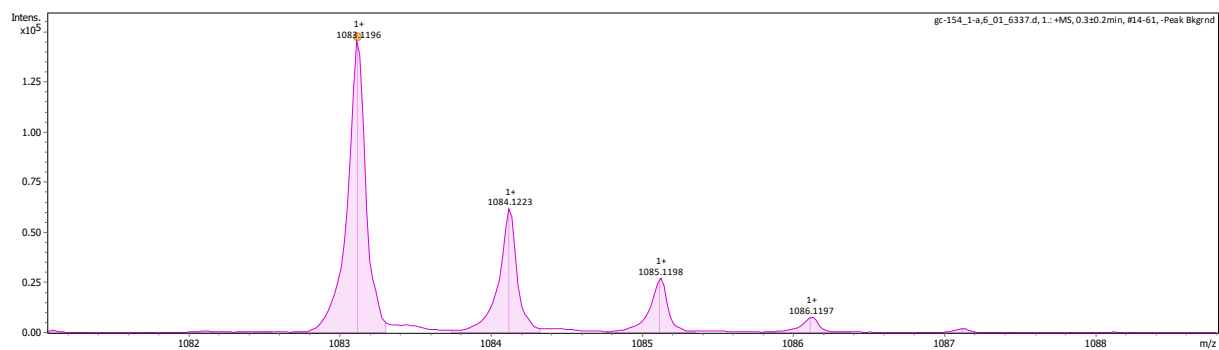

**T2**

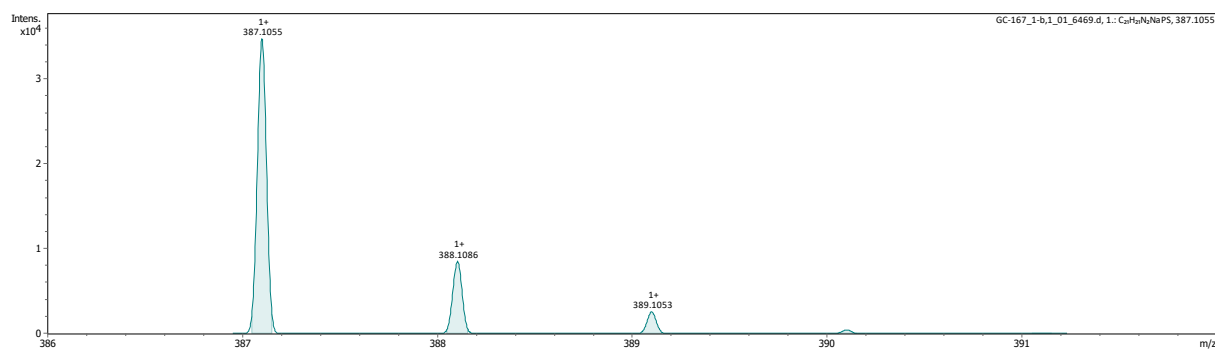

**C2a**

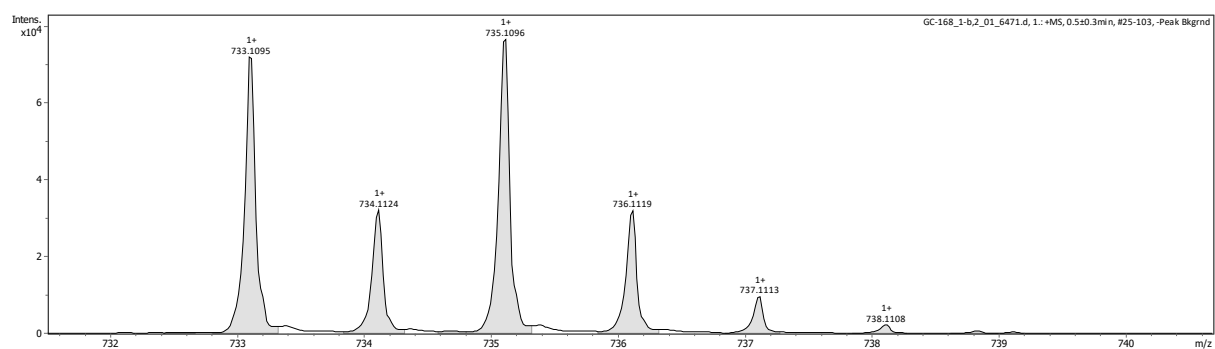

**C2b**

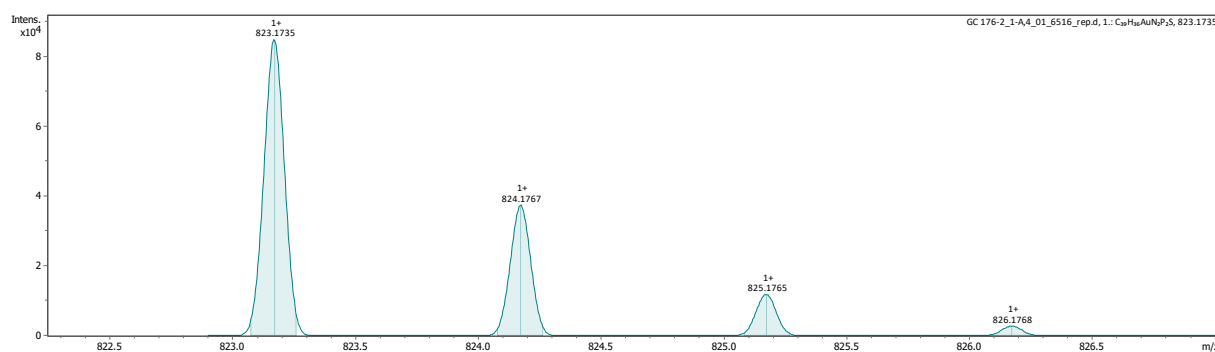

**C2c**

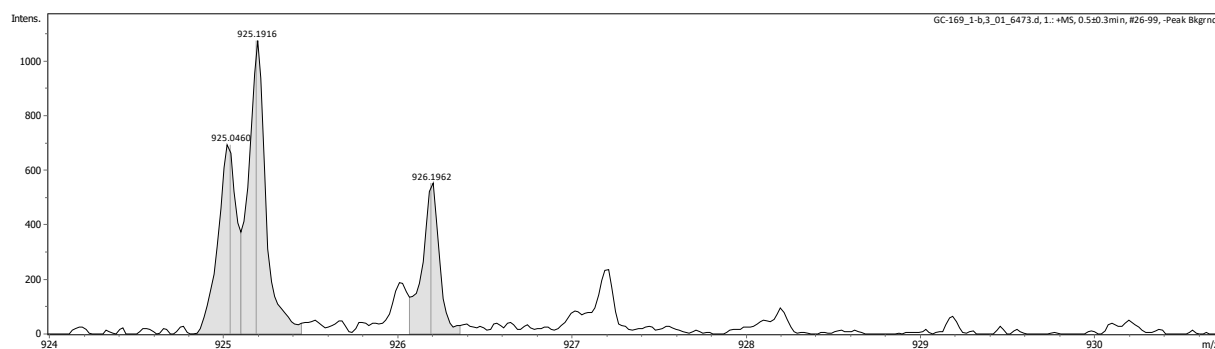

Supplement: s1 [file s1]
